# Supplementary material
Source: PubMed Central journal article supplement (PMC6240853)
Supplement: supp_RA118.004561_138957_1_supp_200595_p7y01d.pdf [file supp_RA118.004561_138957_1_supp_200595_p7y01d.pdf]

## **Supplemental Materials**

A partial reconstitution implicates DltD in catalyzing lipoteichoic acid D-alanylation

B. McKay Wood, John Santa Maria, Leigh Matano, Christopher Vickery, Suzanne Walker

### **Contents:**

**Tables S1-4**

**Figures S1-16**

**Table S1. Summary of phenotypes used to study the DLT pathway**

|                               | <i>Bacillus subtilis</i> | <i>Staph. aureus</i>           | <i>Strep. gordonii</i> | <i>Strep. mutans</i> | <i>Strep. agalactiae</i> | <i>Strep. pneumoniae</i> | Group A <i>Strep.</i> | Group B <i>Strep.</i> | <i>Lactobacillus rhamnosus</i> | <i>Lactobacillus reuteri</i> | <i>Lactobacillus casei</i> | <i>Lactococcus lactis</i> | <i>Clostridium difficile</i> | <i>Listeria monocyt.</i> | <i>Enterococcus faecalis</i> |
|-------------------------------|--------------------------|--------------------------------|------------------------|----------------------|--------------------------|--------------------------|-----------------------|-----------------------|--------------------------------|------------------------------|----------------------------|---------------------------|------------------------------|--------------------------|------------------------------|
| cell wall D-ala content       | (1)                      | (2)                            | (3)                    | (4) (5)              |                          | (6)                      | (7)                   |                       | (8)                            |                              |                            |                           | (9)                          |                          | (10)                         |
| cell surface Western          |                          |                                | (3)                    |                      |                          |                          |                       |                       |                                |                              |                            |                           |                              |                          |                              |
| <b>Antibiotic resistance</b>  |                          |                                |                        |                      |                          |                          |                       |                       |                                |                              |                            |                           |                              |                          |                              |
| CAMPs resistance              |                          | (2) (11)<br>(12) (13)<br>(14)  |                        | (15) (5)             | (16)                     | (6)                      | (7)                   | (17)                  | (18)                           | (19)                         | (20)                       |                           | (9)                          | (21)                     | (10)                         |
| daptomycin                    |                          | (14) (22)<br>(23) (24)<br>(25) |                        |                      |                          |                          |                       |                       |                                |                              |                            |                           |                              |                          |                              |
| methicillin                   | (26)                     | (11) (27)                      |                        |                      |                          |                          |                       |                       |                                |                              |                            |                           |                              |                          |                              |
| defensin                      |                          | (2) (25)                       |                        |                      | (16)                     |                          |                       |                       | (18)                           |                              |                            |                           |                              |                          |                              |
| tunicamycin                   |                          | (28) (29)                      |                        |                      |                          |                          |                       |                       |                                |                              |                            |                           |                              |                          |                              |
| cationic lipodepsipeptides    | (30)                     |                                |                        |                      |                          |                          |                       |                       |                                |                              |                            |                           |                              |                          |                              |
| cationic phospholipase A2     |                          | (31)                           |                        |                      |                          |                          |                       |                       |                                |                              |                            |                           |                              |                          |                              |
| skin extracts                 |                          | (13)                           |                        |                      |                          |                          |                       |                       |                                |                              |                            |                           |                              |                          |                              |
| lysostaphin and lysozyme      | (32)                     | (11) (33)                      |                        |                      |                          |                          |                       |                       |                                |                              |                            |                           |                              |                          |                              |
| anionic detergent             |                          |                                |                        |                      |                          |                          |                       |                       | (18)                           |                              |                            |                           |                              |                          |                              |
| <b>Growth and homeostasis</b> |                          |                                |                        |                      |                          |                          |                       |                       |                                |                              |                            |                           |                              |                          |                              |
| autolysis                     | (34) (26)                | (27)                           |                        |                      |                          |                          | (7)                   |                       | (18)                           | (19)                         |                            | (35)                      |                              |                          |                              |
| low pH growth                 |                          | (36) (37)                      |                        | (4)                  |                          |                          | (7)                   |                       | (18)                           | (19)                         | (20) (38)                  |                           |                              |                          |                              |
| motility defect               | (1)                      |                                |                        |                      |                          |                          |                       |                       |                                |                              |                            |                           |                              |                          |                              |
| cell length                   |                          |                                |                        |                      |                          |                          |                       |                       | (18)                           |                              |                            |                           |                              |                          |                              |
| coaggregation                 |                          |                                | (3)                    |                      |                          |                          |                       |                       |                                |                              |                            |                           |                              |                          |                              |
| protein secretion             | (40)                     |                                |                        |                      |                          |                          |                       |                       |                                |                              |                            |                           |                              |                          |                              |
| Mg2+ induction                |                          | (36) (41)                      |                        |                      |                          |                          |                       |                       |                                |                              |                            |                           |                              |                          |                              |
| colony spreading              |                          | (42)                           |                        |                      |                          |                          |                       |                       |                                |                              |                            |                           |                              |                          |                              |
| growth medium [salt]          |                          | (43)                           |                        |                      |                          |                          |                       |                       |                                |                              |                            |                           |                              |                          |                              |
| high growth temperature       |                          |                                |                        |                      |                          |                          |                       |                       |                                |                              | (20)                       |                           |                              |                          |                              |
| <b>Pathogenesis</b>           |                          |                                |                        |                      |                          |                          |                       |                       |                                |                              |                            |                           |                              |                          |                              |
| virulence                     |                          | (44)                           |                        |                      | (16)                     |                          |                       |                       |                                |                              |                            |                           |                              | (21)                     |                              |
| neutrophil evasion            |                          | (44)                           |                        |                      | (16)                     |                          | (7)                   |                       |                                |                              |                            |                           |                              |                          |                              |
| adherence                     |                          |                                |                        |                      |                          |                          | (7)                   |                       |                                |                              |                            |                           |                              | (21)                     | (10) (45)                    |
| biofilm formation             |                          | (39)                           |                        |                      |                          |                          |                       |                       |                                | (19)                         |                            |                           |                              |                          | (10)                         |
| mouse colonization            |                          |                                |                        |                      |                          |                          |                       |                       |                                | (19)                         |                            |                           |                              |                          |                              |
| human T-cell activation       |                          | (46)                           |                        |                      |                          |                          |                       |                       |                                |                              |                            |                           |                              |                          |                              |
| <b>Cell surface charge</b>    |                          |                                |                        |                      |                          |                          |                       |                       |                                |                              |                            |                           |                              |                          |                              |
| cytochrome c                  | (26)                     | (2) (23)                       |                        | (5)                  |                          |                          | (7)                   |                       |                                |                              |                            |                           |                              |                          |                              |
| crystal violet                |                          |                                |                        | (5)                  |                          |                          |                       |                       |                                |                              |                            |                           |                              |                          |                              |
| GFP                           |                          | (2)                            |                        |                      |                          |                          |                       |                       |                                |                              |                            |                           |                              |                          |                              |
| <b>Cell membrane fluidity</b> |                          |                                |                        |                      |                          |                          |                       |                       |                                |                              |                            |                           |                              |                          |                              |
| fluorescence polarization     |                          | (23)                           |                        |                      |                          |                          |                       |                       |                                |                              |                            |                           |                              |                          |                              |

**Table S1. Primers**

| Primer  | Sequence 5' to 3'                                                           | Description                                                                                                                                                                           |
|---------|-----------------------------------------------------------------------------|---------------------------------------------------------------------------------------------------------------------------------------------------------------------------------------|
| Cloning |                                                                             |                                                                                                                                                                                       |
| PMW56   | GCCGCGCGGCAGCCATACAGATATTATTAA<br>CAAGCTGC                                  | Infusion forward cloning primer for dltA minus start codon into pET15b-NdeI/BamHI                                                                                                     |
| PMW57   | GTTAGCAGCCGGATCCTTATCCGTTAATTA<br>CCTCTGCAATTTTC                            | Infusion reverse cloning primer for dltA into pET15b-NdeI/BamHI                                                                                                                       |
| PMW14   | TTTCATATGGAATTTAGAGAACAAGT                                                  | dltC cloning forward primer with TTT-NheI addition to 5'                                                                                                                              |
| PMW8    | TTTGGATCCTCATCGTAACTTCTAATGC                                                | dltC cloning reverse primer with TTT-BamHI addition to 3'-end of gene, reverse complement                                                                                             |
| PMW60   | GCCGCGCGGCAGCCATAAAATTAACCTTT<br>TTTACCC                                    | Infusion forward cloning primer for dltD minus start codon into pET15b-NdeI/BamHI                                                                                                     |
| PMW61   | GTTAGCAGCCGGATCCTAATTTTTAGGTTT<br>ATCTACTTC                                 | Infusion reverse cloning primer for dltD into pET15b-NdeI/BamHI                                                                                                                       |
| PMW62   | GCCGCGCGGCAGCCATACAGGATTAGTAA<br>ATGAAAAAGAC                                | Infusion forward cloning primer for dltDtrunc into pET15b-NdeI/BamHI                                                                                                                  |
| PMW63   | GCCGCGCGGCAGCCATGCAATATTAGGTTT<br>AGGCACG                                   | Infusion forward cloning primer for Ecoli acpS minus start codon into pET15b-NdeI/BamHI                                                                                               |
| PMW64   | GTTAGCAGCCGGATCCTAACTTCAATAA<br>TTACCGTGGC                                  | Infusion reverse cloning primer for Ecoli acpS into pET15b-NdeI/BamHI                                                                                                                 |
| SM61    | GATTGTCGACTGAGTTCTAATGAGGGAG                                                | Sall forward primer for cloning SaDLT into pLOW                                                                                                                                       |
| SM64    | TTAAGGATCCTTAATTTTTAGGTTTATCTAC<br>TTC                                      | BamHI reverse primer for cloning SaDLT into pLOW                                                                                                                                      |
| SM148   | GATTGGTACCTGAGTTCTAATGAGGGAG                                                | KpnI forward primer for cloning dltABCD plus RBS into pTP63-KpnI/BlpI                                                                                                                 |
| SM149   | TTAAGCTCAGCTTAATTTTTAGGTTTATCTA<br>CTTC                                     | BlpI reverse primer for cloning dltABCD plus RBS into pTP63-KpnI/BlpI                                                                                                                 |
| PMW142  | CAAAAATTAATTTTACAAGAAGATTTATTA<br>AAACCTTTTTTACCATTTAATTAGTGG               | 5'-dltD myc-tagging forward primer                                                                                                                                                    |
| PMW143  | TAAATCTTCTCTGAAATTAATTTTTGTCT<br>TTCATCGTAACTTCTTAATGC                      | 5'-dltD myc-tagging reverse primer                                                                                                                                                    |
| PMW144  | TTAAGCTCAGCTAAATCTTCTCTGAAATT<br>AATTTTTGTTCTTAATTTTTAGGTTTATCTA<br>CTTCAGG | 3'-dltD myc-tagging reverse primer                                                                                                                                                    |
| PMW181  | TTTGGTACCTGAGTTCTAATGAGGGAGACT<br>TAATATGAAATTAACCTTTTTTACCC                | dltD cloning forward primer with KpnI site + SaDLT RBS addition to 5'-end (used with SM149)                                                                                           |
| PMW214  | AGAATCATGGAACAAAAATTAATTTTCA<br>AGAAGATTTAAGTTTCAAAAAAAGAAAA<br>TT          | LtaS N-terminal myc-tagging forward primer to be used with PMW216 in the construction of the insert for cloning into pTP63 (to be followed by amplification with PMW215)              |
| PMW215  | AGAGTATGATGGTACCTATCTAAATAACGG<br>GGGAAAGAATCATGGAACAAAAAATT                | Infusion forward cloning primer for ltaS with native RBS and N-terminal myc tag into (KpnI/BlpI) pTP63                                                                                |
| PMW216  | AGCGACCGGCGCTCAGCTTATTTTTAGAG<br>TTTGCTTTAGG                                | Infusion reverse cloning primer for ltaS into (KpnI/BlpI) pTP63                                                                                                                       |
| PMW217  | AGAGTATGATGGTACCTATCTAAATAACGG<br>GGGAAAGAATCATGAGTTCACAAAAAAG<br>A         | Infusion forward cloning primer for ltaS with native RBS into (KpnI/BlpI) pTP63                                                                                                       |
| PMW218  | CTTCTTCTGAAATTAATTTTTGTTCTTTTTTA<br>GAGTTTGCTTTAGG                          | LtaS C-terminal myc-tagging primer (stop codon removed) to be used with PMW217 in the construction of the insert for cloning into pTP63 (to be followed by amplification with PMW219) |
| PMW219  | AGCGACCGGCGCTCAGCTTATAAATCTTCT<br>TCTGAAATTAATTTTTG                         | Infusion reverse cloning primer for ltaS with C-terminal myc tag (new stop codon) into (KpnI/BlpI) pTP63 (to be used with product of PMW217/218)                                      |

| Sequencing       |                                                                |                                                                                                 |
|------------------|----------------------------------------------------------------|-------------------------------------------------------------------------------------------------|
| PMW97            | CGACTGAAGTTACGGACAATGC                                         | Forward sequencing primer for the 3'-end of <i>dltA</i> and the 5'-end of <i>dltB</i>           |
| PMW126           | GTGTCTAACAGCAATGCTTTGTGG                                       | Reverse primer for SaDLT promoter sequencing; anneals inside <i>dltA</i> near the 5' end        |
| PMW149           | GTAGATAATGGTGGTAAAATTTACG                                      | Forward sequencing primer <i>dlt</i> downstream region (from within <i>dltD</i> )               |
| PMW156           | CAATCAAATCGTTGAGTTATGTGC                                       | Reverse primer for amplifying from downstream of <i>dltD</i> on the <i>S. aureus</i> chromosome |
| DltD mutagenesis |                                                                |                                                                                                 |
| PMW129           | GTATTATCCTATATACGGCTCTGCTGAATT<br>AGGTAAAGATGACCC              | <i>dltD</i> S70A mutagenesis forward primer                                                     |
| PMW130           | GGGTCATCTTTACCTAATTCAGCAGAGCCG<br>TATATAGGATAATAC              | <i>dltD</i> S70A mutagenesis reverse primer                                                     |
| PMW150           | GTATTATCCTATATACGGCTCTGTTGAATTA<br>GGTAAAGATGACCC              | <i>dltD</i> S70V mutagenesis forward primer                                                     |
| PMW151           | GGGTCATCTTTACCTAATTCACAGAGCCG<br>TATATAGGATAATAC               | <i>dltD</i> S70V mutagenesis reverse primer                                                     |
| PMW204           | GTATTATCCTATATACGGCTCTGTGAATTA<br>GGTAAAGATGACCC               | <i>dltD</i> S70C mutagenesis forward primer                                                     |
| PMW205           | GGGTCATCTTTACCTAATTCACAAGAGCCG<br>TATATAGGATAATAC              | <i>dltD</i> S70C mutagenesis reverse primer                                                     |
| PMW222           | TATCCTATATACGGCTCTAGTGCTTTAGGT<br>AAAGATGACCCATTTAATCC         | <i>dltD</i> E71A mutagenesis forward primer                                                     |
| PMW223           | GGATTAAATGGGTCATCTTTACCTAAAGCA<br>CTAGAGCCGTATATAGGATA         | <i>dltD</i> E71A mutagenesis reverse primer                                                     |
| PMW224           | TATCCTATATACGGCTCTAGTCAATTAGGT<br>AAAGATGACCCATTTAATCC         | <i>dltD</i> E71Q mutagenesis forward primer                                                     |
| PMW225           | GGATTAAATGGGTCATCTTTACCTAATTTGA<br>CTAGAGCCGTATATAGGATA        | <i>dltD</i> E71Q mutagenesis reverse primer                                                     |
| PMW230           | CAAGTATTATCCTATATACGGCTCTAGTAA<br>TTTAGGTTAAAGATGACCCATTTAATCC | <i>dltD</i> E71N mutagenesis forward primer                                                     |
| PMW231           | GGATTAAATGGGTCATCTTTACCTAAATTA<br>CTAGAGCCGTATATAGGATAACTTGT   | <i>dltD</i> E71N mutagenesis reverse primer                                                     |
| PMW131           | TAACATTTATTATTTACCAGCATGGTTTAC<br>AAACCATGG                    | <i>dltD</i> Q129A mutagenesis forward primer                                                    |
| PMW132           | CCATGGTTTGTAAACCATGCTGGTGAAATA<br>ATAAATGTTA                   | <i>dltD</i> Q129A mutagenesis reverse primer                                                    |
| PMW206           | TAACATTTATTATTTACCATGTTGGTTTAC<br>AAACCATGG                    | <i>dltD</i> Q129C mutagenesis forward primer                                                    |
| PMW207           | CCATGGTTTGTAAACCAACATGGTGAAATA<br>ATAAATGTTA                   | <i>dltD</i> Q129C mutagenesis reverse primer                                                    |
| PMW133           | CATTTATTATTTACCACAAGCATTTACAA<br>ACCATGGTTTAAACG               | <i>dltD</i> W130A mutagenesis forward primer                                                    |
| PMW134           | CGTTAAACCATGGTTTGTAAATGCTTGTGG<br>TGAAATAATAAATG               | <i>dltD</i> W130A mutagenesis reverse primer                                                    |
| PMW208           | CATTTATTATTTACCACAATGTTTTACAAA<br>CCATGGTTTAAACG               | <i>dltD</i> W130C mutagenesis forward primer                                                    |
| PMW209           | CGTTAAACCATGGTTTGTAAACATTGTGG<br>TGAAATAATAAATG                | <i>dltD</i> W130C mutagenesis reverse primer                                                    |
| PMW135           | GATTATGAAAAATATGTTATCAGTGCTGCC<br>GTACACATCGGTTGG              | <i>dltD</i> D358A mutagenesis forward primer                                                    |
| PMW136           | CCAACCGATGTGTACGGCAGCACTGATAAC<br>ATATTTTTCATAATC              | <i>dltD</i> D358A mutagenesis reverse primer                                                    |
| PMW210           | GATTATGAAAAATATGTTATCAGTGTGCTGCC<br>GTACACATCGGTTGG            | <i>dltD</i> D358C mutagenesis forward primer                                                    |
| PMW211           | CCAACCGATGTGTACGGCACAACCTGATAAC<br>ATATTTTTCATAATC             | <i>dltD</i> D358C mutagenesis reverse primer                                                    |
| PMW137           | TATGTTATCAGTGATGCCGTAGCAATCGGT<br>TGGAAAGGTTGGG                | <i>dltD</i> H361A mutagenesis forward primer                                                    |
| PMW138           | CCCAACCTTTCCAACCGATGCTACGGCAT<br>CACTGATAACATA                 | <i>dltD</i> H361A mutagenesis reverse primer                                                    |

| DltB mutagenesis |                                                             |                                                                                                                  |
|------------------|-------------------------------------------------------------|------------------------------------------------------------------------------------------------------------------|
| PMW98            | GACATTATCATTCTGGTTCAGAGATTCTATT<br>TACATGAGATCITTATTCTACATG | dltB C304S mutagenesis forward primer                                                                            |
| PMW99            | CATGTAGAATAAAGATCTCATGTAAATAGA<br>ATCTCTGAACCAGAATGATAATGTC | dltB C304S mutagenesis reverse primer                                                                            |
| PMW145           | TATTAAGATTCTGGAATAGATGGGCTAT<br>GACATTATCATTCTGGTTCAGAG     | dltB H294A mutagenesis forward primer                                                                            |
| PMW146           | CTCTGAACCAGAATGATAATGTCATAGCCC<br>ATCTATTCCAGAAATCTTTAATA   | dltB H294A mutagenesis reverse primer                                                                            |
| PMW147           | TATTAAGATTCTGGAATAGATGGAATAT<br>GACATTATCATTCTGGTTCAGAG     | dltB H294N mutagenesis forward primer                                                                            |
| PMW148           | CTCTGAACCAGAATGATAATGTCATATTCC<br>ATCTATTCCAGAAATCTTTAATA   | dltB H294N mutagenesis reverse primer                                                                            |
| PMW73            | CATAATGGGAATTTGGGCGGGTATCGAAGT<br>GTAT                      | dltB H341A mutagenesis forward primer                                                                            |
| PMW74            | ATACACTTCGATACCCGCCAAATTCCCAT<br>TATG                       | dltB H341A mutagenesis reverse primer                                                                            |
| LtaS mutagenesis |                                                             |                                                                                                                  |
| CRV55            | AGCACCTGAAGATGACTTAACAAAAGTATT<br>AA                        | ltaS S218P mutagenesis forward primer                                                                            |
| CRV56            | TTTCAGGTGCTAGCGCTTTTTGTTGATTATT                             | ltaS S218P mutagenesis reverse primer                                                                            |
| rtPCR            |                                                             |                                                                                                                  |
| PMW154           | GATTCTTTCCAAACAGTTGGATT                                     | dltC rtPCR primer1 (133nt product)                                                                               |
| PMW155           | CGTAACTCTTCTAATGCTTCAACG                                    | dltC rtPCR primer2 (133nt product)                                                                               |
| PMW240           | GAAATCTAAAAGTAAACAGCCACCT                                   | Forward primer to test dltX dltA cotranscription                                                                 |
| PMW241           | TTACTACCTTGTAATCGATGTGCT                                    | Reverse primer to test dltX dltA cotranscription                                                                 |
| PMW242           | GACAACCAATTACTATGTTGAATCT                                   | Forward primer to test SAOUHSC_00867 dltX cotranscription (can be used with PMW241 to test dltA cotranscription) |
| PMW243           | GAAGTTATTGTGTGTGTCGCC                                       | Reverse primer to test SAOUHSC_00867 dltX cotranscription                                                        |

**Table S2. Plasmids**

| Name                      | Description                  | Purpose                                                                                                                                                   |
|---------------------------|------------------------------|-----------------------------------------------------------------------------------------------------------------------------------------------------------|
| <i>E. coli</i> plasmids   |                              |                                                                                                                                                           |
| pMW16                     | pET15b-dltA1                 | N-terminal hexahistidine tagged SaDltA expression vector for T7 infected <i>E. coli</i>                                                                   |
| pMW18                     | pET15b-dltD1                 | N-terminal hexahistidine tagged SaDltD expression vector for T7 infected <i>E. coli</i>                                                                   |
| pMW19                     | pET15b-dltDtrunc1            | N-terminal hexahistidine tagged N-terminally truncated, soluble SaDltD expression vector for T7 infected <i>E. coli</i>                                   |
| pMW20                     | pET15b-dltC2                 | N-terminal hexahistidine tagged SaDltC expression vector for T7 infected <i>E. coli</i>                                                                   |
| pMW21                     | pET15b-acpS2                 | N-terminal hexahistidine tagged EcAcpS expression vector for T7 infected <i>E. coli</i> ; acpS used to make holo-DltC                                     |
| pMW138                    | pET15b-dltD S70A1            | Expression plasmid for N-terminally 6His-tagged DltD S70A site-directed mutant (start - 770bp verified)                                                   |
| pMW162                    | pET15b-dltD E71A2            | Expression plasmid for N-terminally 6His-tagged DltD E71A site-directed mutant (1-740bp verified)                                                         |
| pMW164                    | pET15b-dltD E71N1            | Expression plasmid for N-terminally 6His-tagged DltD E71N site-directed mutant; (1-968bp verified)                                                        |
| pMW163                    | pET15b-dltD E71Q1            | Expression plasmid for N-terminally 6His-tagged DltD E71A site-directed mutant (1-740bp verified)                                                         |
| pMW149                    | pET15b-dltD Q129A1           | Expression plasmid for N-terminally 6His-tagged DltD Q129A site-directed mutant (54 - 1119bp verified)                                                    |
| pMW150                    | pET15b-dltD Q129C1           | Expression plasmid for N-terminally 6His-tagged DltD Q129C site-directed mutant (54 - 1119bp verified)                                                    |
| pMW151                    | pET15b-dltD W130A1           | Expression plasmid for N-terminally 6His-tagged DltD W130A site-directed mutant (54 - 1119bp verified)                                                    |
| pMW152                    | pET15b-dltD W130C1           | Expression plasmid for N-terminally 6His-tagged DltD W130C site-directed mutant (54 - 1119bp verified)                                                    |
| pMW134                    | pET15b-dltD D358A            | Expression plasmid for N-terminally 6His-tagged DltD D358A site-directed mutant; sequenced 3/17/2016                                                      |
| pMW139                    | pET15b-dltD H361A1           | Expression plasmid for N-terminally 6His-tagged DltD H361A site-directed mutant (247 - 1165bp verified)                                                   |
| <i>S. aureus</i> plasmids |                              |                                                                                                                                                           |
| pMW35                     | pLOW-SadltABCD               | made by Samir; dlt knockout complementation plasmid;                                                                                                      |
| pMW38                     | pLOW-SaDLT (dltB H341A)2     | <i>S. aureus</i> dlt complementation vector with H341A site-directed mutation; Quikchange colony 2                                                        |
| pMW55                     | pTP63-SaDLT [2]              | Samir's complementation plasmid expressing <i>S. aureus</i> DLT operon; sequenced 5/29/15 and 6/1/15 (verified entire dlt operon except dltA 1-31 and 70) |
| pMW98                     | pTP63-dltD1                  | <i>S. aureus</i> dltD complementation vector (bp 93-1131 verified)                                                                                        |
| pMW84                     | pTP63-SaDLT (myc-dltD)1      | <i>S. aureus</i> dlt complementation vector with N-terminal myc-tagged dltD; sequenced DltCD genes 7/15/2015                                              |
| pMW78                     | pTP63-SaDLT (dltD-myc)2      | <i>S. aureus</i> dlt complementation vector with C-terminal myc-tagged dltD (dltD 270-3'end verified)                                                     |
| pMW117                    | pTP63-SaDLT (myc-dltD S70A)1 | <i>S. aureus</i> dlt complementation vector with N-terminally myc-tagged dltD containing S70A site-directed mutation, sequenced 2/8/2016                  |
| pMW144                    | pTP63-SaDLT (myc-dltD S70C)1 | <i>S. aureus</i> dlt complementation vector with N-terminally myc-tagged dltD containing S70C site-directed mutation (dltD sequence verified 92-768bp)    |

|        |                               |                                                                                                                                                                               |
|--------|-------------------------------|-------------------------------------------------------------------------------------------------------------------------------------------------------------------------------|
| pMW121 | pTP63-SaDLT (myc-dltD S70V)1  | S. aureus dlt complementation vector with N-terminally myc-tagged dltD containing S70V site-directed mutation, sequenced 2/8/2016                                             |
| pMW160 | pTP63-SaDLT (myc-dltD E71A)1  | S. aureus dlt complementation vector with N-terminally myc-tagged dltD E71A mutant; sequenced 11/9/2016                                                                       |
| pMW167 | pTP63-SaDLT (myc-dltD E71N)1  | S. aureus dlt complementation vector with N-terminally myc-tagged dltD E71N mutant (29-1015bp of dltD verified)                                                               |
| pMW161 | pTP63-SaDLT (myc-dltD E71Q)1  | S. aureus dlt complementation vector with N-terminally myc-tagged dltD E71Q mutant; sequenced 11/9/2016                                                                       |
| pMW148 | pTP63-SaDLT (myc-dltD Q129A)1 | S. aureus dlt complementation vector with N-terminally myc-tagged dltD containing Q129A site-directed mutation (dltC verified from 95-3'-end; dltD verified 5'myc tag-1117bp) |
| pMW145 | pTP63-SaDLT (myc-dltD Q129C)1 | S. aureus dlt complementation vector with N-terminally myc-tagged dltD containing Q129C site-directed mutation (dltD sequence verified 92-942bp)                              |
| pMW124 | pTP63-SaDLT (myc-dltD W130A)1 | S. aureus dlt complementation vector with N-terminally myc-tagged dltD containing W130A site-directed mutation, sequenced 2/25/2016                                           |
| pMW146 | pTP63-SaDLT (myc-dltD W130C)1 | S. aureus dlt complementation vector with N-terminally myc-tagged dltD containing W130C site-directed mutation (dltD sequence verified 82-834bp)                              |
| pMW85  | pTP63-SaDLT (myc-dltD D358A)1 | S. aureus dlt complementation vector with N-terminal myc-tagged dltD D358A site-directed mutant (dltD 191-1131 verified)                                                      |
| pMW147 | pTP63-SaDLT (myc-dltD D358C)1 | S. aureus dlt complementation vector with N-terminally myc-tagged dltD containing D358C site-directed mutation (dltD sequence verified 531-1080bp)                            |
| pMW87  | pTP63-SaDLT (myc-dltD H361A)1 | S. aureus dlt complementation vector with N-terminal myc-tagged dltD H361A site-directed mutant (dltD 215-1132 verified)                                                      |
| pMW73  | pTP63-myc-DltB                | S. aureus dlt complementation vector with N-terminal myc-tagged dltB (dltA 1343-3'end and dltB 5'end-696 verified)                                                            |
| pMW75  | pTP63-dltB-myc                | S. aureus dlt complementation vector with C-terminal myc-tagged dltB (dltB 432-3'end verified)                                                                                |
| pMW91  | pTP63-SaDLT (dltB-myc H294A)1 | S. aureus dlt complementation vector with C-terminal myc-tagged dltB H294A site-directed mutant (dltB 215-1170 verified)                                                      |
| pMW93  | pTP63-SaDLT (dltB-myc H294N)1 | S. aureus dlt complementation vector with C-terminal myc-tagged dltB H294N site-directed mutant (dltB 189-1161 verified)                                                      |
| pMW95  | pTP63-SaDLT (dltB-myc H341A)1 | S. aureus dlt complementation vector with C-terminal myc-tagged dltB H341A site-directed mutant (dltB 229-1170 verified)                                                      |
| pMW154 | pTP63-myc-ltaS1               | S. aureus dlt complementation vector with N-terminally myc-tagged ltaS (verified start-882bp and 1058-1889bp)                                                                 |
| pMW156 | pTP63-ltaS-myc1               | S. aureus dlt complementation vector with C-terminally myc-tagged ltaS (verified 38-725bp and 970-last bp)                                                                    |
| pMW165 | pTP63-myc-ltaS S218P2         | S. aureus integrative vector with N-terminally myc-tagged LtaS and S219P mutation (1-938bp verified)                                                                          |
| pMW166 | pTP63-ltaS-myc S218P1         | S. aureus integrative vector with C-terminally myc-tagged LtaS and S219P mutation (26-938bp verified)                                                                         |

**Table S3. Strains**

| Strain           | Background | Genotype/ plasmid                                                | Antibiotic ( $\mu\text{g}/\text{mL}$ ) |
|------------------|------------|------------------------------------------------------------------|----------------------------------------|
| <i>S. aureus</i> |            |                                                                  |                                        |
|                  | RN4220     |                                                                  |                                        |
|                  | Newman     |                                                                  |                                        |
| JSM1             | Newman     | $\Delta\text{dltA}$                                              |                                        |
| LM1              | Newman     | $\text{dltB}::\text{kanR}$                                       | Kan(50) Neo(50)                        |
| LM2              | Newman     | $\text{dltC}::\text{kanR}$                                       | Kan(50) Neo(50)                        |
| JSM2             | Newman     | $\text{dltD}::\text{kanR}$                                       | Kan(50) Neo(50)                        |
|                  | RN4220     | auxillary plasmid for integration of pTP63                       | Tet(5)                                 |
|                  | HG003      | $\text{spa}::\text{tn-ErmR}$                                     | Erm(5)                                 |
|                  | SEJ1       |                                                                  |                                        |
| 4S5              | SEJ1       | $\Delta\text{tlaS } \Delta\text{gdpP}$                           |                                        |
|                  |            |                                                                  |                                        |
| BMW57            | Newman     | pLOW                                                             | Erm(5)                                 |
| BMW63            | Newman     | pMW35 1                                                          | Erm(5)                                 |
| BMW72            | Newman     | $\Delta\text{dltA/ pLOW1}$                                       | Erm(5)                                 |
| BMW92            | Newman     | $\Delta\text{dltA/ pLOW-SaDLT1}$                                 | Erm(5)                                 |
| BMW74            | Newman     | $\text{dltB}::\text{kanR/ pLOW1}$                                | Erm(5) Kan(50) Neo(50)                 |
| BMW67            | Newman     | $\text{dltB}::\text{kanR/ pLOW-SaDLT1}$                          | Erm(5) Kan(50) Neo(50)                 |
| BMW90            | Newman     | $\text{dltC}::\text{kanR/ pLOW1}$                                | Erm(5) Kan(50) Neo(50)                 |
| BMW68            | Newman     | $\text{dltC}::\text{kanR/ pLOW-SaDLT1}$                          | Erm(5) Kan(50) Neo(50)                 |
| BMW65            | Newman     | $\text{dltD}::\text{kanR/ pLOW}$                                 | Erm(5) Kan(50) Neo(50)                 |
| BMW70            | Newman     | $\text{dltD}::\text{kanR/ pLOW-SaDLT1}$                          | Erm(5) Kan(50) Neo(50)                 |
|                  |            |                                                                  |                                        |
| BMW173           | Newman     | pTP63                                                            | Cam(10)                                |
| BMW174           | Newman     | pMW84; pTP63-SaDLT (myc-dltD)1                                   | Cam(10)                                |
| BMW188           | Newman     | $\text{dltD}::\text{kan/ pTP63}$                                 | Cam(10) Kan(50) Neo(50)                |
| BMW175           | Newman     | $\text{dltD}::\text{kan/ pMW84; pTP63-SaDLT (myc-dltD)1}$        | Cam(10) Kan(50) Neo(50)                |
| BMW304           | Newman     | pMW117; pTP63-SaDLT (myc-dltD S70A)1                             | Cam(10)                                |
| BMW305           | Newman     | $\text{dltD}::\text{kan/ pMW117; pTP63-SaDLT (myc-dltD S70A)1}$  | Cam(10) Kan(50) Neo(50)                |
| BMW306           | Newman     | pMW121; pTP63-SaDLT (myc-dltD S70V)1                             | Cam(10)                                |
| BMW307           | Newman     | $\text{dltD}::\text{kan/ pMW121; pTP63-SaDLT (myc-dltD S70V)1}$  | Cam(10) Kan(50) Neo(50)                |
| BMW245           | Newman     | pMW85; pTP63-SaDLT (myc-dltD D358A)1                             | Cam(10)                                |
| BMW248           | Newman     | $\text{dltD}::\text{kan/ pMW85; pTP63-SaDLT (myc-dltD D358A)1}$  | TSB/10Cam/50Kan/50Neo                  |
| BMW244           | Newman     | pMW87; pTP63-SaDLT (myc-dltD H361A)1                             | TSB/10Cm                               |
| BMW247           | Newman     | $\text{dltD}::\text{kan/ pMW87; pTP63-SaDLT (myc-dltD H361A)1}$  | TSB/10Cam/50Kan/50Neo                  |
| BMW365           | Newman     | pMW148; pTP63-SaDLT (myc-dltD Q129A)1                            | Cam(10)                                |
| BMW366           | Newman     | $\text{dltD}::\text{kan/ pMW148; pTP63-SaDLT (myc-dltD Q129A)1}$ | Cam(10) Kan(50) Neo(50)                |
| BMW367           | Newman     | pMW124; pTP63-SaDLT (myc-dltD W130A)1                            | Cam(10)                                |
| BMW368           | Newman     | $\text{dltD}::\text{kan/ pMW124; pTP63-SaDLT (myc-dltD W130A)1}$ | Cam(10) Kan(50) Neo(50)                |
| BMW349           | Newman     | pMW61; pTP63-SaDLT (dltD W130A)5                                 | Cam(10)                                |
| BMW342           | Newman     | $\text{dltD}::\text{kan/ pMW61; pTP63-SaDLT (dltD W130A)5}$      | Cam(10) Kan(50) Neo(50)                |
| BMW354           | Newman     | pMW144; pTP63-SaDLT (myc-dltD S70C)1                             | Cam(10)                                |
| BMW364           | Newman     | $\text{dltD}::\text{kan/ pMW144; pTP63-SaDLT (myc-dltD S70C)1}$  | Cam(10) Kan(50) Neo(50)                |
| BMW359           | Newman     | pMW147; pTP63-SaDLT (myc-dltD D358C)1                            | Cam(10)                                |



|                |            |                                                  |                         |
|----------------|------------|--------------------------------------------------|-------------------------|
| BMW360         | Newman     | dltD::kan/ pMW147; pTP63-SaDLT (myc-dltD D358C)1 | Cam(10) Kan(50) Neo(50) |
| BMW355         | Newman     | pMW145; pTP63-SaDLT (myc-dltD Q129C)1            | Cam(10)                 |
| BMW356         | Newman     | dltD::kan/ pMW145; pTP63-SaDLT (myc-dltD Q129C)1 | Cam(10) Kan(50) Neo(50) |
| BMW357         | Newman     | pMW146; pTP63-SaDLT (myc-dltD W130C)1            | Cam(10)                 |
| BMW358         | Newman     | dltD::kan/ pMW146; pTP63-SaDLT (myc-dltD W130C)1 | Cam(10) Kan(50) Neo(50) |
| BMW406         | Newman     | pMW160; pTP63-SaDLT (myc-dltD E71A)1             | Cam(10)                 |
| BMW407         | Newman     | dltD::kan/ pMW160; pTP63-SaDLT (myc-dltD E71A)1  | Cam(10) Kan(50) Neo(50) |
| BMW408         | Newman     | pMW161; pTP63-SaDLT (myc-dltD E71Q)1             | Cam(10)                 |
| BMW409         | Newman     | dltD::kan/ pMW161; pTP63-SaDLT (myc-dltD E71Q)1  | Cam(10) Kan(50) Neo(50) |
| BMW428         | Newman     | pMW167; pTP63-SaDLT (myc-dltD E71N)              | Cam(10)                 |
| BMW429         | Newman     | pMW167; dltD::kan/pTP63-SaDLT (myc-dltD E71N)    | Cam(10) Kan(50) Neo(50) |
|                |            |                                                  |                         |
| BMW252         | Newman     | pMW98; pTP63-dltD1                               | Cam(10)                 |
| BMW253         | Newman     | dltD::kan/pMW98; pTP63-dltD1                     | Cam(10) Kan(50) Neo(50) |
|                |            |                                                  |                         |
| BMW176         | Newman     | pMW75; pTP63-SaDLT (dltB-myc)2                   | Cam(10)                 |
| BMW122         | Newman     | dltB::kanR/pTP63                                 | Cam(10) Kan(50) Neo(50) |
| BMW197         | Newman     | dltB::kan/pMW75; pTP63-SaDLT (dltB-myc)2         | Cam(10) Kan(50) Neo(50) |
| BMW320         | Newman     | pMW95; pTP63-SaDLT (dltB-myc H341A)1             | Cam(10)                 |
| BMW321         | Newman     | dltB::kan/ pMW95; pTP63-SaDLT (dltB-myc H341A)1  | Cam(10) Kan(50) Neo(50) |
| BMW240         | Newman     | pMW91; pTP63-SaDLT (dltB-myc H294A)1             | Cam(10)                 |
| BMW249         | Newman     | dltB::kan/pMW91; pTP63-SaDLT (dltB-myc H294A)1   | Cam(10) Kan(50) Neo(50) |
| BMW241         | Newman     | pMW93; pTP63-SaDLT (dltB-myc H294N)1             | Cam(10)                 |
| BMW250         | Newman     | dltB::kan/pMW93; pTP63-SaDLT (dltB-myc H294N)1   | Cam(10) Kan(50) Neo(50) |
|                |            |                                                  |                         |
| BMW400         | Newman     | pMW154; pTP63-myc-ltaS1                          | Cam(10)                 |
| BMW401         | Newman     | pMW156; pTP63-ltaS-myc1                          | Cam(10)                 |
| BMW391         | Newman     | dltD::kan/pMW154; pTP63-myc-ltaS1                | Cam(10) Kan(50) Neo(50) |
| BMW392         | Newman     | dltD::kan/pMW156; pTP63-ltaS-myc1                | Cam(10) Kan(50) Neo(50) |
| BMW422         | Newman     | pMW165; pTP63-myc-ltaS S218P2                    | Cam(10)                 |
| BMW423         | Newman     | pMW166; pTP63-ltaS-myc S218P1                    | Cam(10)                 |
| BMW424         | Newman     | dltD::kan/pMW165; pTP63-myc-ltaS S218P2          | Cam(10) Kan(50) Neo(50) |
| BMW414         | HG003      | spa::tn-ErmR/ pMW154; pTP63-myc-ltaS1            | Erm(5) Cam(10)          |
| BMW415         | HG003      | spa::tn-ErmR/ pMW156; pTP63-ltaS-myc1            | Erm(5) Cam(10)          |
| BMW431         | HG003      | spa::tn-ErmR/ pMW166; pTP63-ltaS-myc S218P1      | Erm(5) Cam(10)          |
| BMW432         | 4S5        | $\Delta$ ltaS $\Delta$ gdpP dltD::kan            | Kan(50) Neo(50)         |
| <i>E. coli</i> |            |                                                  |                         |
|                | XL1 Blue   | tetR                                             | Tet(10)                 |
|                | BL21 (DE3) |                                                  |                         |
| BMW27          | BL21 (DE3) | pMW16; pET15b-dltA                               | Amp(100)                |
| BMW28          | BL21 (DE3) | pMW17; pET15b-dltB                               | Amp(100)                |
| BMW29          | BL21 (DE3) | pMW18; pET15b-dltD                               | Amp(100)                |
| BMW30          | BL21 (DE3) | pMW19; pET15b-dltDtrunc                          | Amp(100)                |
| BMW33          | BL21 (DE3) | pMW20; pET15b-dltC2                              | Amp(100)                |
| BMW34          | BL21 (DE3) | pMW21; pET15b-acpS                               | Amp(100)                |
| BMW378         | BL21 (DE3) | pMW149; pET15b-dltD Q129A                        | Amp(100)                |
| BMW379         | BL21 (DE3) | pMW150; pET15b-dltD Q129C                        | Amp(100)                |

|        |            |                           |          |
|--------|------------|---------------------------|----------|
| BMW380 | BL21 (DE3) | pMW151; pET15b-dltD W130A | Amp(100) |
| BMW381 | BL21 (DE3) | pMW152; pET15b-dltD W130C | Amp(100) |
| BMW395 | BL21 (DE3) | pMW138; pET15b-dltD S70A  | Amp(100) |
| BMW396 | BL21 (DE3) | pMW134; pET15b-dltD D358A | Amp(100) |
| BMW397 | BL21 (DE3) | pMW139; pET15b-dltD H361A | Amp(100) |
| BMW412 | BL21 (DE3) | pMW163; pET15b-dltD E71Q  | Amp(100) |
| BMW413 | BL21 (DE3) | pMW162; pET15b-dltD E71A  | Amp(100) |
| BMW417 | BL21 (DE3) | pMW164; pET15b-dltD E71N  | Amp(100) |

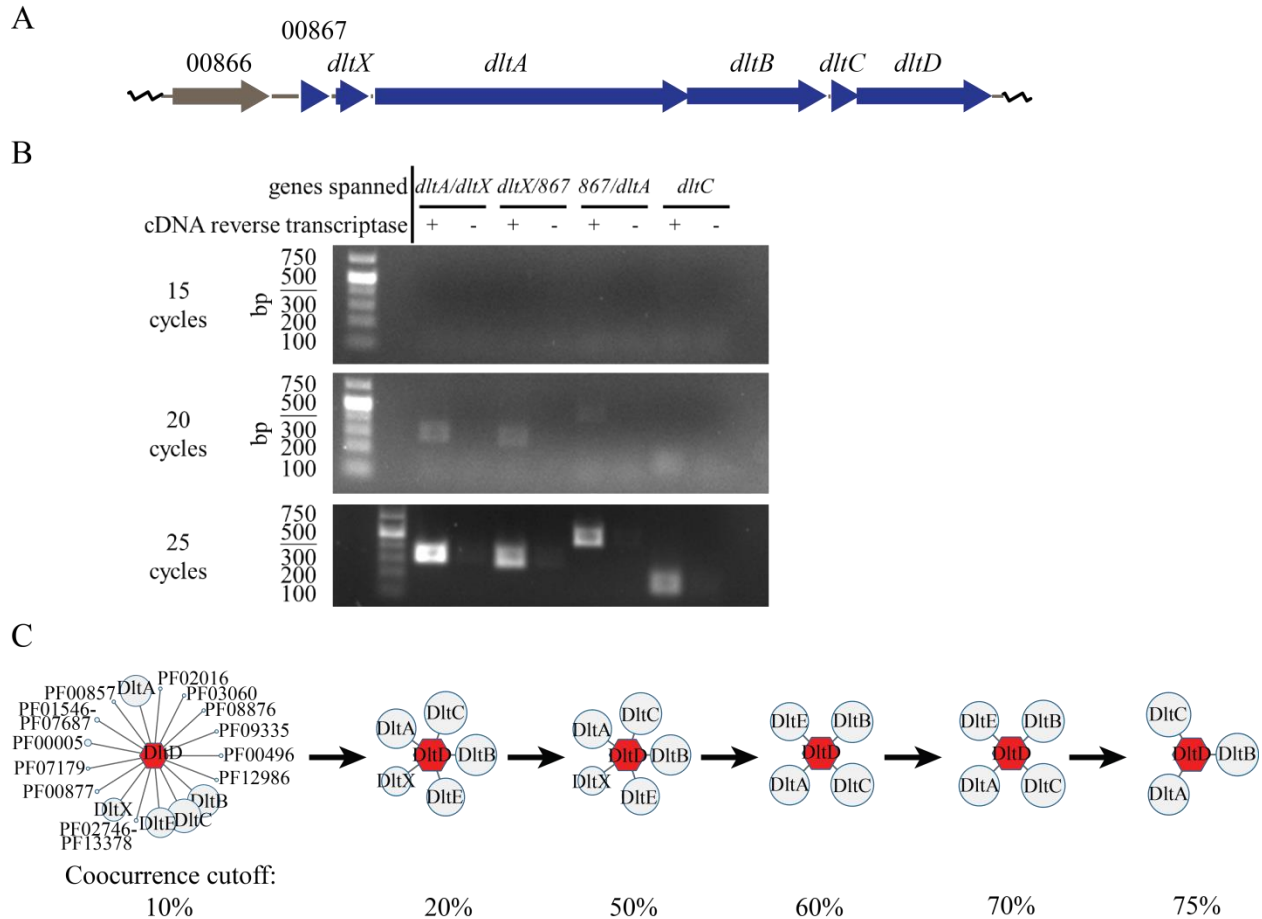

**Figure S1.** The *S. aureus* *dlt* operon contains 6 genes while genome-neighborhood networks demonstrate a minimal, 4 gene operon. Upstream of the recognized *dltABCD* operon is often found several genes in the same orientation. Neuhaus *et al.* stated that *dltE* and *dltX* “are not important for D-alanylation (Figure 9)”; however, no primary source was given (47). Previous studies showed that the farthest upstream gene, SAOUHSC\_00866, is not co-transcribed with *dltABCD* (41). Panel A shows a cartoon of the putative operon structure in *S. aureus*. Here, we used rtPCR with primers spanning two genes each to test if the putative, upstream ORFs, SAOUHSC\_00867 and SAOUHSC\_00868 (*dltX*), are co-transcribed with *dltA*. Each sample of cDNA was prepared along with a separate “minus reverse transcriptase” sample to control for genomic DNA contamination. WT Newman cDNA (+ or - reverse transcriptase, RT) from cells grown to mid-log phase were tested with primers PMW240–PMW241 (*dltX*–*dltA*), PMW242–PMW243 (SAOUHSC\_00867–*dltX*), PMW242–PMW241 (SAOUHSC\_00867–*dltA*), and PMW154–PMW155 (*dltC* control). In Panel B, the results from 20 and 25 cycles clearly show a product for each pair of primers of the expected length without noticeable background in the -RT lanes. Also, test products formed at similar intensity cycle number as the *dltC* control reaction which would be expected if they were originating from the same mRNA. Therefore, the two ORFs upstream of *dltA* are part of the transcribed *dlt* operon. Lastly, a simple, statistical analysis was performed to test how often additional ORFs co-occur with *dltD*. The genome-neighborhood tool from the Enzyme Function Initiative (<http://efi.igb.illinois.edu/efi-gnt/>) was used with a Gram+ DltD SSN (PF04919) with a neighborhood size of 6 genes and varying cooccurrence cutoff stringencies to analyze the conservation of genes in the neighborhood of *dltD*. The red hexagonal node in the center of each network represents DltD, and the “spoke” nodes show proteins names or Pfam designations for genes cooccurring with DltD at a frequency less than or equal to the cutoff value indicated. Since *dltX* and *dltE* are present in less than 60% or 75% of

dltD-encoding genomes, respectively, dltABCD are likely the only genes required for D-alanylation. The short ORF SAOUHSC\_00867 is either not common enough to appear or is un-appreciated as an ORF in most encoding genomes.

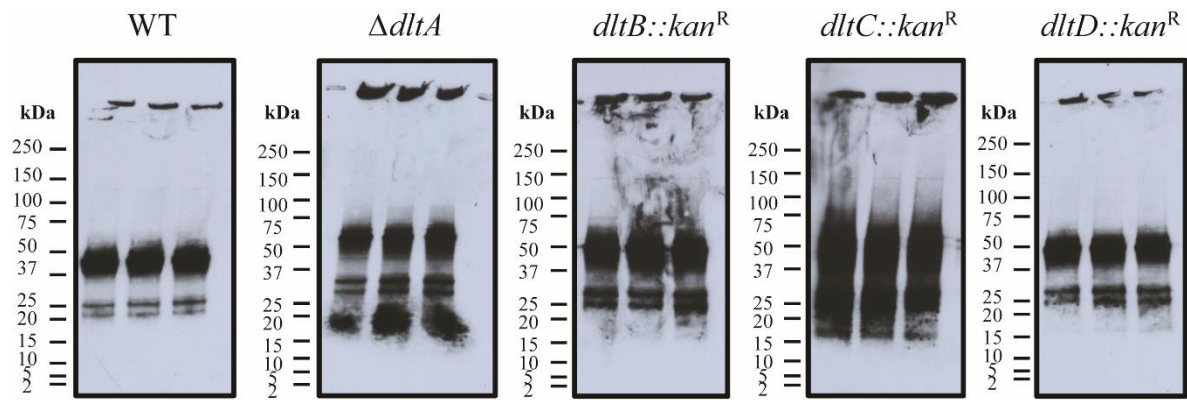

**Figure S2.** Mutations in the *dlt* operon do not reduce LTA abundance. Newman wildtype and *dlt* mutants were grown in TSB broth to OD ca. 1 before the cells were normalized to OD 1 and triplicate 0.1 mL aliquots were pelleted and frozen. Anti-polyglycerolphosphate (LTA) Western blot of the triplicate samples was carried-out similar to Grundling, *et. al* (48). The HRP-conjugate-containing blot was developed with ECL substrate and exposed to X-ray film. The 50 kDa band corresponds to protein A, and the 20 – 25 kDa smear is LTA.

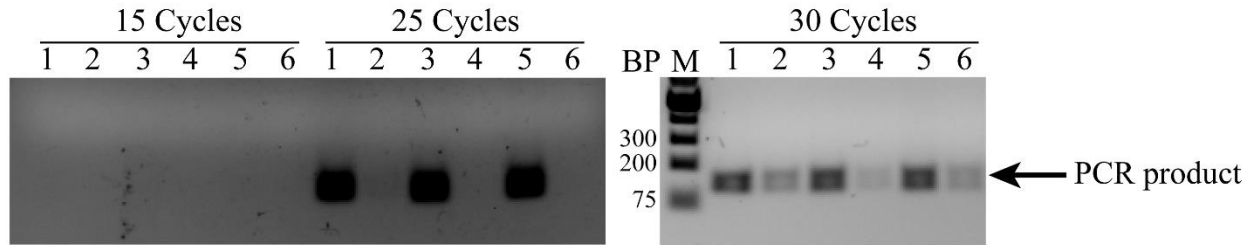

1. Newman wildtype with Reverse Transcriptase
2. Newman wildtype without Reverse Transcriptase
3. Newman  $\Delta dltB::kan$  with RT
4. Newman  $\Delta dltB::kan$  without RT
5. Newman  $\Delta dltD::kan$  with RT
6. Newman  $\Delta dltD::kan$  without RT

**Figure S3.** *Transcription of dltC is unaffected by the genetic deletion of dltB or dltD in those null mutants.* rtPCR was carried-out for the *dltC* gene from cDNA prepared from mid-log phase cultures of Newman WT, *dltB::kan*, and *dltD::kan* strains. Lanes 2, 4, and 6 contain samples to which reverse transcriptase was not added to the cDNA to show the level of DNA contamination in the RNA purifications. The PCR yield after 25 cycles from +RT cDNA samples for all three strains' mRNA look identical (no product at 15 cycles), so expression of *dltC* appears roughly unaffected in those two mutants. At 30 cycles, low levels of background product become apparent. All PCR reactions were identically prepared.

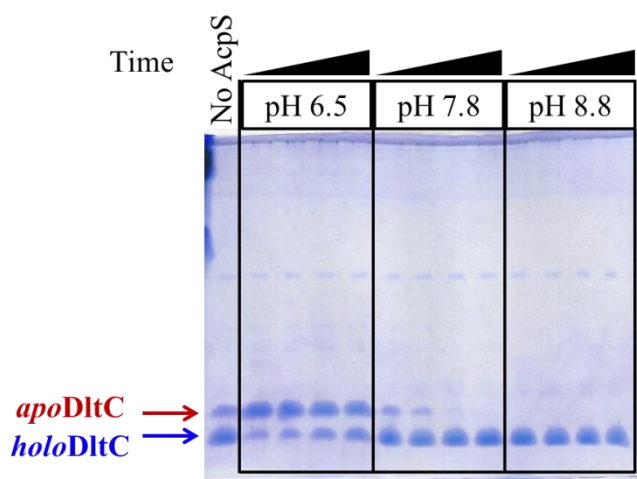

**Figure S4.** Native PAGE analysis of in vitro phosphopantetheinylation of purified *S. aureus* DltC. DltC purified from *E. coli* ran as two bands on 15% native PAGE following hexahistidine-tag cleavage by thrombin. A time course of AcpS-catalyzed phosphopantetheinylation was carried out at three different pH values, 6.5 (bisTris), 7.8 (Tris), and 8.8 (Tris), to observe conditions for preparation of holoDltC. After 0.5, 2, 5, 15 min, reactions containing 100  $\mu$ M DltC, 250  $\mu$ M CoA, and 3  $\mu$ M AcpS were electrophoresed. Protein was imaged following Coomassie staining.

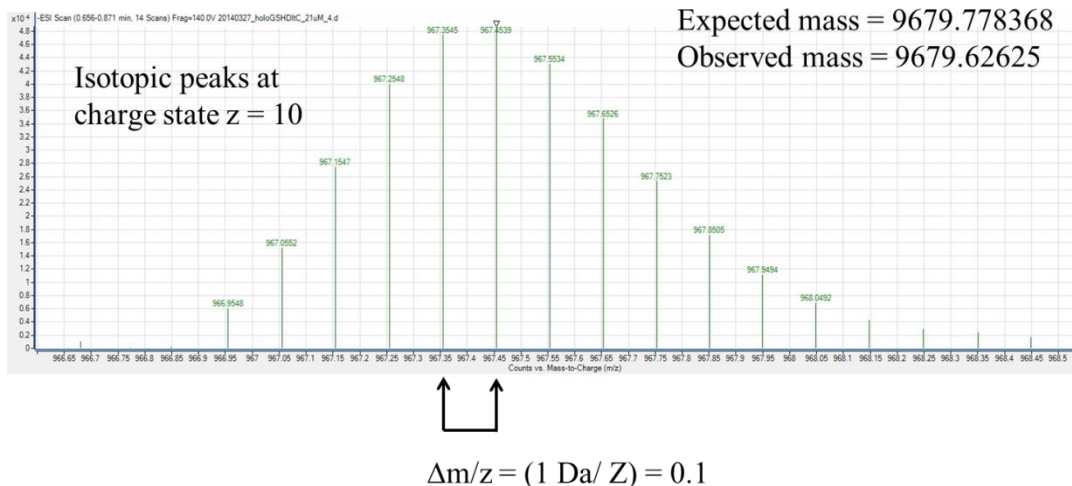

**Figure S5.** MS analysis of *holoDltC*. The thrombin cleaved and AcpS loaded *holoDltC* protein was analyzed by direct-infusion MS (Agilent 6520 Q-TOF) to confirm phosphopantetheinylation. The sequence of *DltC* (SAOUHSC\_00871) was expected to be modified by the thrombin cleavage scar (*N*-terminal GlySerHis) which results from removal of the hexahistidine tag. Shown is a zoomed x-axis for isotope peaks corresponding to  $z = 10$ . The observed mass of 9679.62625 agrees well with the expected *holo-GSH-DltC* protein's expected mass, 9679.778368.



# A

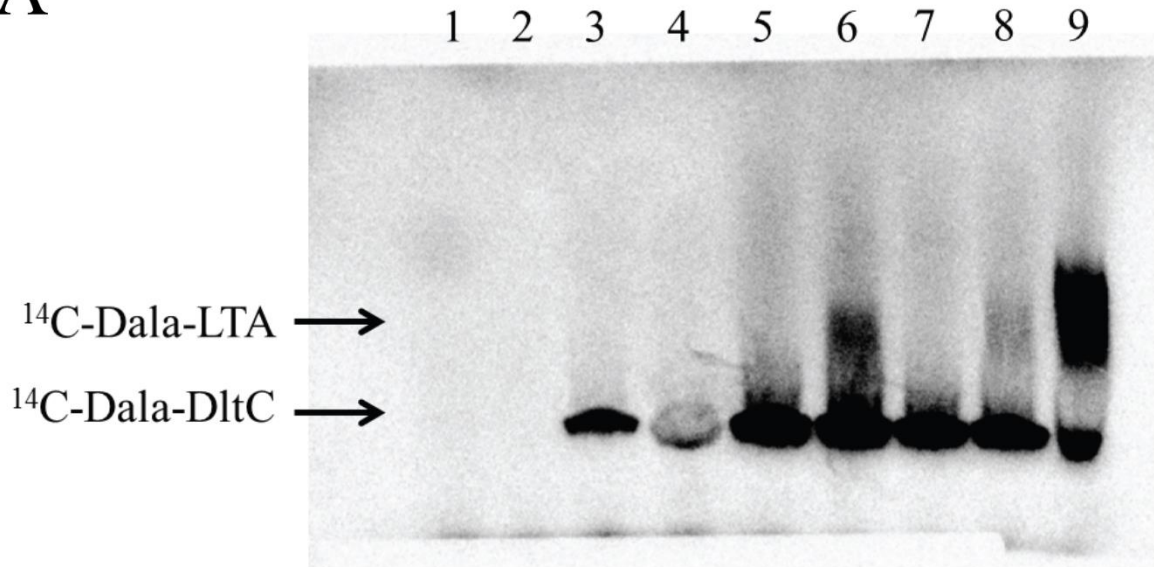

1. no membranes
2. WT with no ATP
3.  $\Delta ltaS$  membranes
4.  $\Delta dltD$ /empty vector membranes
5.  $\Delta dltD$ / pS70A membranes
6.  $\Delta dltD$ / pD358A membranes
7.  $\Delta dltD$ / pH361A membranes
8.  $\Delta dltD$ / pWT membranes
9. WT membranes

# B

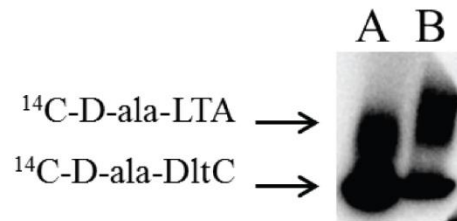

Figure S6. Vesicles from complemented *dlt* null strains support in vitro LTA D-alanylation. Vesicles prepared from fractionated membranes from a series of strains were incubated individually with  $^{14}\text{C}$ -D-ala-DltC to test for LTA D-alanylation. In Panel A, Lanes 2 and 9 show vesicles from parent *S. aureus* Newman; while lanes 4 – 8 show the Newman *dltD* null strain with a series of plasmids.  $^{14}\text{C}$ -D-ala-LTA formation can be seen for wild-type strain as well as DltD wild-type and D358A complemented *dltD* null strain. Lastly, no  $^{14}\text{C}$ -D-ala-LTA formation was observed for vesicles prepared from the *ltaS* null strain,

4S5 (49). *Panel B* shows a separate test of whether purified DltD inserts into the membrane vesicles. Vesicles from *dltD* null mutant (Lane A) and wild-type Newman membranes (Lane B) (36  $\mu$ g total membrane protein each) were mixed with 8  $\mu$ M purified DltD and incubated at 30°C for 5 min before ultracentrifugation at 100,000 x g for 30 min. The reconstituted vesicles were then treated with  $^{14}$ C-D-ala-DltC for 30 min before running on SDS-PAGE. The *dltD* null mutant with reconstituted DltD (Lane A) shows significant  $^{14}$ C-D-ala-LTA formation compared to wild-type vesicles (Lane B). The slight difference in the apparent mobility of the two lanes is partially due to stretching of the gel during drying that resulted in the gel cracking.

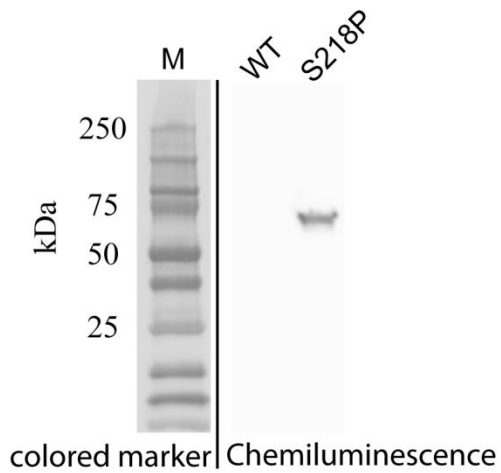

**Figure S7** *LtaS* is absent from vesicles due to site-specific cleavage. *LtaS* was expressed from a plasmid in *S. aureus* with a C-terminal myc fusion. Wild-type *LtaS* was not detectible by Western blot in vesicles prepared from fractionated membranes of the same strain. The S218P mutant expressed with a C-terminal myc tag from the same plasmid and strain showed robust signal after vesicle preparation. Both vesicles were loaded at 37  $\mu$ g of total membrane protein. Full length *LtaS*-myc is 76.8 kDa.

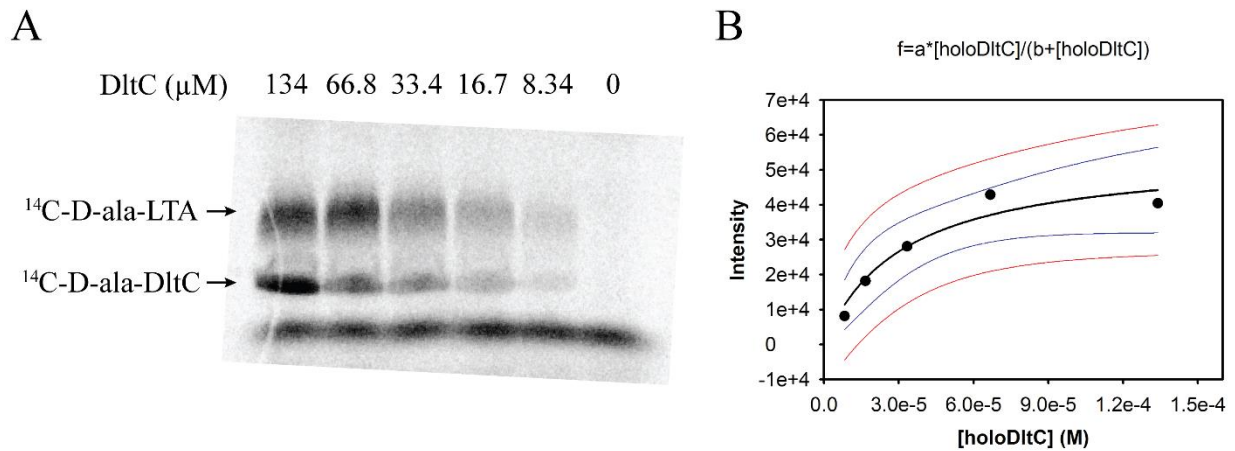

**Figure S8.** Dependence of *in vitro* LTA D-alanylation on D-ala-holoDltC concentration. The *in vitro* LTA D-alanylation assay was performed with varying concentrations from 0 to 134  $\mu\text{M}$  DltC. Each DltA-catalyzed holoDltC charging reaction was preceded by DltA inactivation with MTSES (see *Experimental procedures*). Each  $^{14}\text{C-D-ala-holoDltC}$  was then treated with the same amount of vesicles before 4 – 20% SDS-PAGE and autoradiography. Densitometry was performed using the software ImageJ, and the background corrected intensities for  $^{14}\text{C-D-ala-LTA}$  were plotted against D-ala-holoDltC concentration. The data was fit to a rectangular hyperbola (blue line equals 95% confidence), and the following variables were calculated:  $a = 54632.6304$  intensity units and  $b = 3.17\text{E-}05$  M. The  $b$  value was taken as the concentration of  $^{14}\text{C-D-ala-holoDltC}$  yielding 50% maximal *in vitro* LTA D-alanylation after 30 min.

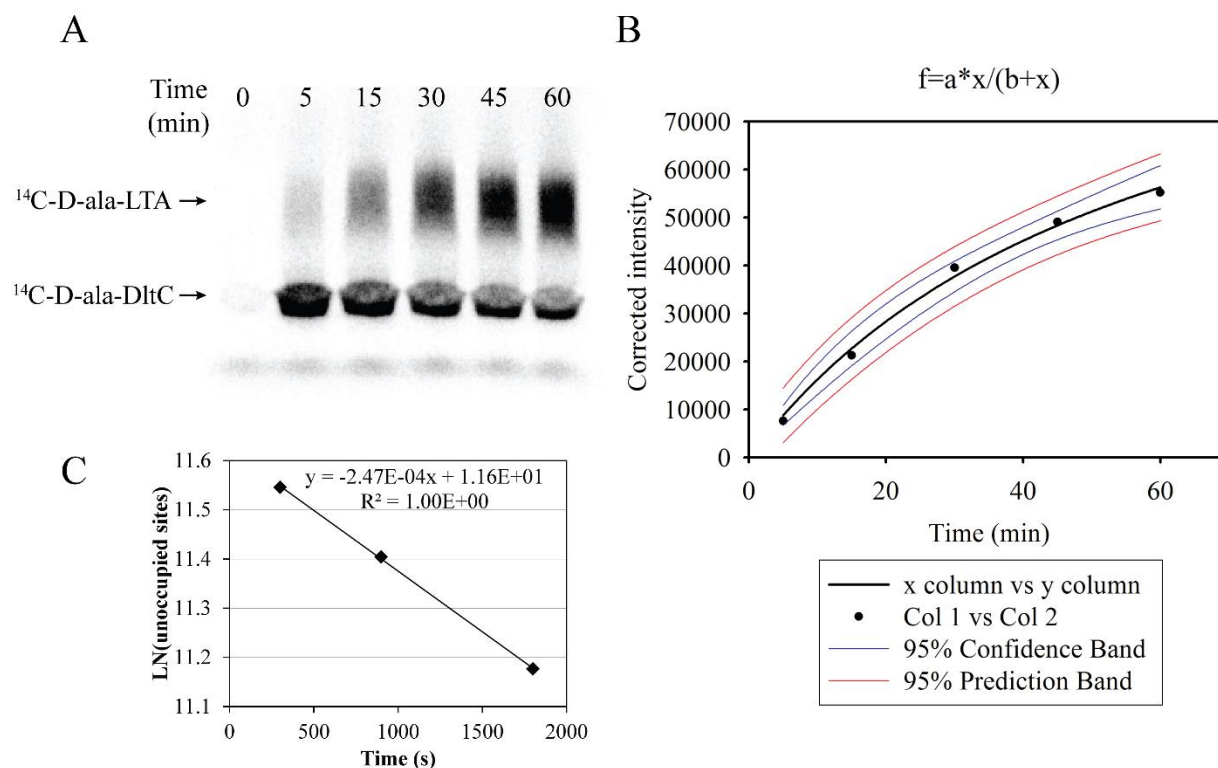

**Figure S9.** In vitro LTA D-alanylation shows a half-life of approximately 50 min. In vitro LTA D-alanylation with membrane-vesicles from wild type *S. aureus* was conducted over time course. DltA was quenched with 5 mM MTSES after DltC D-alanylation was complete but before initiation LTA D-alanylation by addition of membranes. Autoradiography from SDS-PAGE separated LTA was used for densitometry (representative exposure in Panel A). Normalized, background-corrected intensities from two different exposure times (to correct for limited dynamic range) was plotted against time to calculate the maximum possible intensity,  $a = 110981$  (Panel B). This value was taken as the initial abundance of available LTA D-alanylation sites ( $A_0$ ), and the difference between the intensity at each time point,  $t$ , and  $A_0$  yielded the remaining, unoccupied D-alanylation sites,  $A_t$ . The data between 5 and 30 min approached linearity, so the natural log of those values were used to calculate a first-order rate constant from a plot of  $\ln(A_t) = -kt + \ln(A_0)$  (Panel C). A half-life for unoccupied LTA D-alanylation sites of 46.8 min was calculated from the rate constant,  $k = 2.47 \times 10^{-4} \text{ s}^{-1}$ .

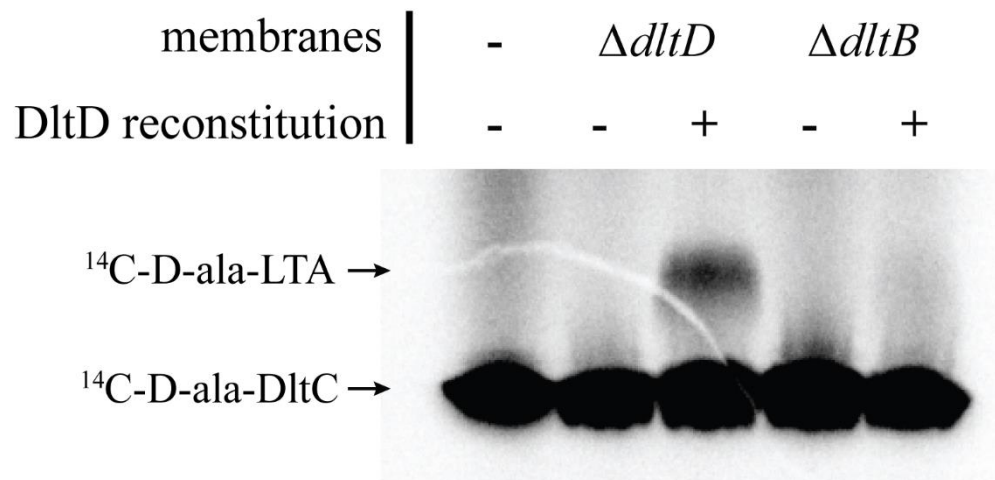

**Figure S10.** In vitro LTA D-alanylation with DltD reconstituted membranes depends on the presence of DltB. Purified, full length DltD was reincorporated into vesicles of membranes from a *dltD* null mutant (lanes 3) or a *dltB* null mutant (lanes 5) of *S. aureus*. DltC  $^{14}\text{C}$ -D-alanylation by DltA *in vitro* without addition of DltD was carried-out in the presence (lanes 2 and 4) or absence (lane 1) of membranes. Thus, the  $^{14}\text{C}$ -D-ala-LTA band was dependent on all DLT components, and DltC D-alanylation was independent of the membrane-bound steps. The dependence of LTA D-alanylation activity on the presence of DltB is evidence that the LTA D-alanylation *in vitro* is mechanistically the same as *in vivo* LTA D-alanylation, *i.e.*, DltD did not directly transfer D-alanine from DltC to LTA all on one face of the membrane.

A

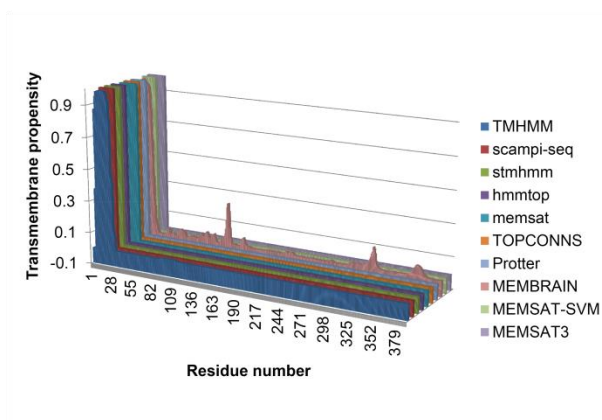

B.

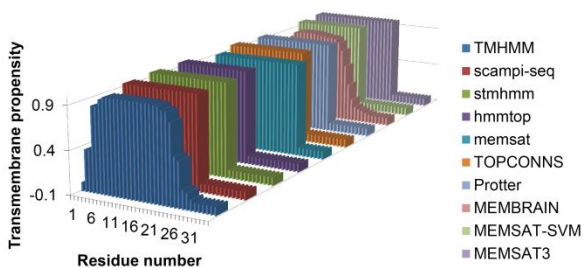

**Figure S11.** *DltD* is predicted to contain one membrane spanning helix at the N-terminus. The results from analysis of *DltD*'s primary structure by several commonly used membrane protein topology prediction software were plotted above. The propensity to form a transmembrane helix at each residue was plotted across the entire polypeptide (*Panel A*), and the unanimous N-terminal helix is zoomed in *Panel B* (residues 7 and 27 based on an average of all results).

A

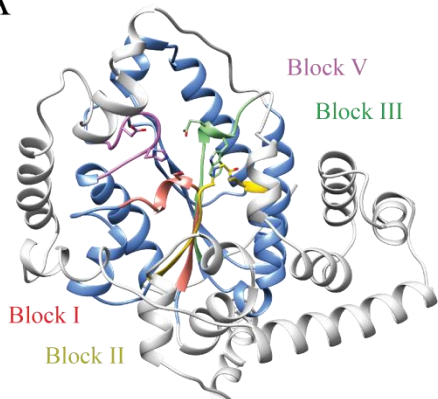

B

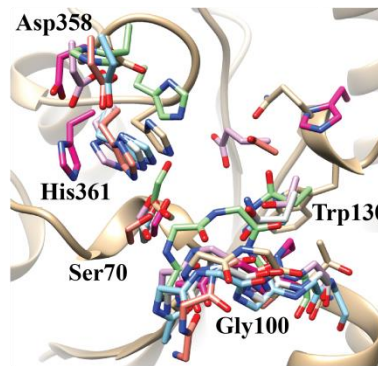

C

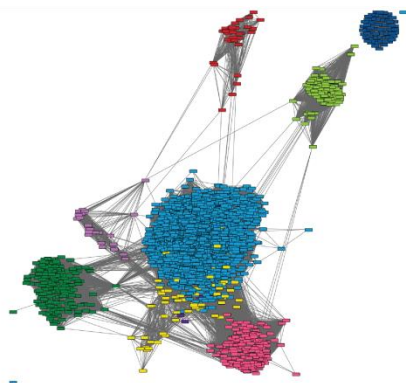

AlgJ/X, WssI - PF16822

OatAc

PF00657

PF03629

PatB - PF04311

DltD - PF04914

TAP - PF13472

PF13227

PF16255

D

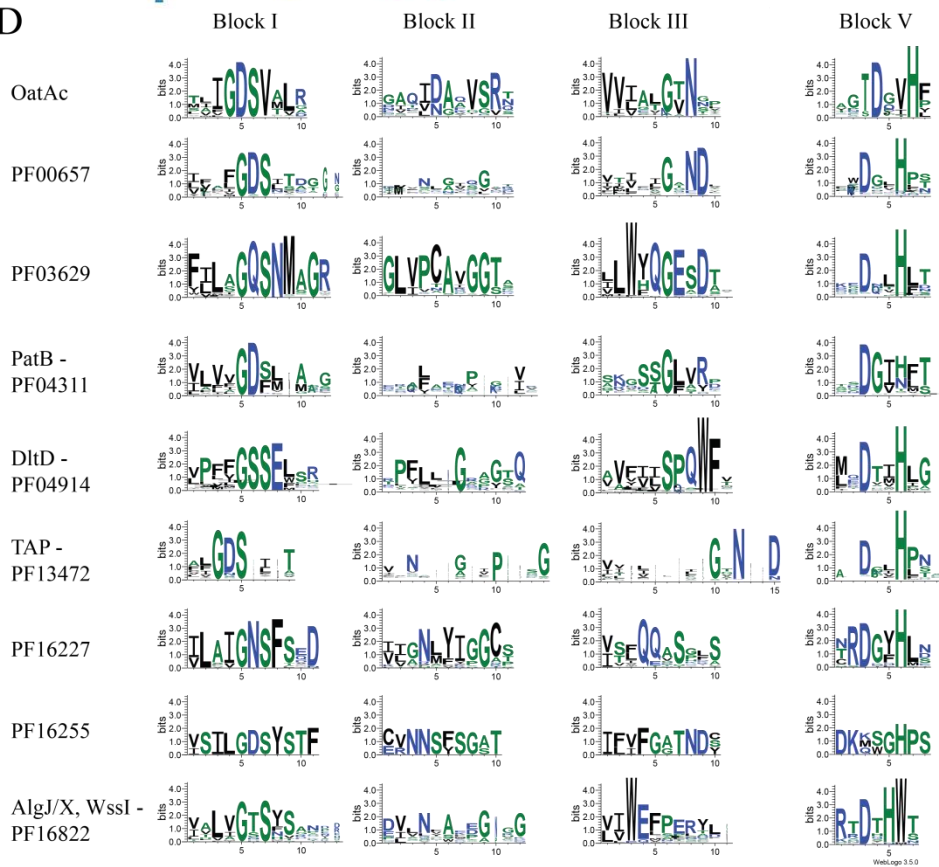



**Figure S12.** *Conserved blocks of residues across SGNH-like proteins.* Analysis of proteins evolutionarily related to DltD was undertaken to gain insight into active site residues. In *Panel A*, the homology model of *S. aureus* DltD is colored to illustrate four blocks of residues which contribute to the active-site and which house the majority of the conserved residues. The greyed secondary structure includes the *N*-terminal transmembrane helix as well as the large insertion in the DltD protein, residues 133-282, relative to every other SGNH-family member. The blocks are colored salmon (Block I, residues 64 – 74), golden rod (Block II, residues 93 – 103), light green (Block III, residues 122 – 132), and orchid (Block V, residues 356 – 363) (all residue numbering corresponds to *S. aureus* DltD). For the top 40 hits from a DALI server query of DltD, each represented Pfam family was downloaded. Structural alignments of single representative structures for each family are shown in *Panel B*: DltD (tan, 3bma), TAP (blue, 1IVN, Z score = 10.3), EstA (pink, 1ZMB, Z score = 7.8), EstA-like (green, 3U37, Z score = 8.5), uncharacterized (salmon and grey, 4I8I (Z score = 8.0) and 4M8K (Z score = 9.4), and AlgX (pink, 4KNC). Structural alignments aided alignment of these divergent sequences and extraction of the conserved blocks of residues recognized for SGNH family proteins (50). Top BLAST hits for the C-terminal domain of OatA, which was independently identified as an SGNH-like protein, were separately downloaded and aligned because structures and Pfam designations were both lacking for this domain. Because of the low sequence identity (and insertions, *e.g.*, DltD, or structural rearrangement, *i.e.*, AlgJ/AlgX/WssI proteins) between all of these proteins, each of the four extracted blocks of residues for each protein were joined into polypeptide sequences of 30-40 amino acids (5134 total sequences), and they were A) submitted as a custom database to the EFI-EST server (<http://efi.igb.illinois.edu/efi-est/>) and B) aligned *via* MUSCLE for manual analysis. The resulting sequence similarity network is shown in *Panel C*. The sequence divergence of DltD is sufficiently far from the rest of the SGNH-like proteins that DltD sequences do not connect with the other families in the network at the lenient all-by-all BLAST E value cutoff of 0.1. The other known or proposed transferases, *i.e.*, AlgJ/X/WssI, PatB, OatAc, all show connections to the large hydrolase family, PF13472, which includes the *E. coli* TAP. This suggests that a transferase evolved from a hydrolase one or more times in this large, putative family and provides proof-of-principle for DltD's proposed evolutionary origins. In *Panel D*, the MUSCLE alignments are illustrated as sequence logo representations of each block for each family. The meaning of colors is not consistent across panels, and the colors in *Panel D* do not represent any chemical property. This analysis shows the catalytic triad (S7 Block I and D3 and H6 of Block V – extracted DltD numbering) as well as the turn before the S7 (G5 of Block I) to be extremely important across these diverse enzymes. The Asp of the catalytic triad appears to be less well conserved than His because the Block V DxxH motif also appears as a DxH motif (*e.g.*, the AlgX-like proteins, Pfam family PF16822) or the Asp is missing all together (scattered examples). The oxyanion hole contributor at G7 of Block II is also shown to be important. Lastly, the titular Asn, *e.g.*, N12 of Block III for PF13472, for which the SG'N'H family is named, is lacking in many families including DltD, so the SGNH term is a misnomer. Taken together, it is possible that the DltD family is part of this family albeit the most divergent subfamily.

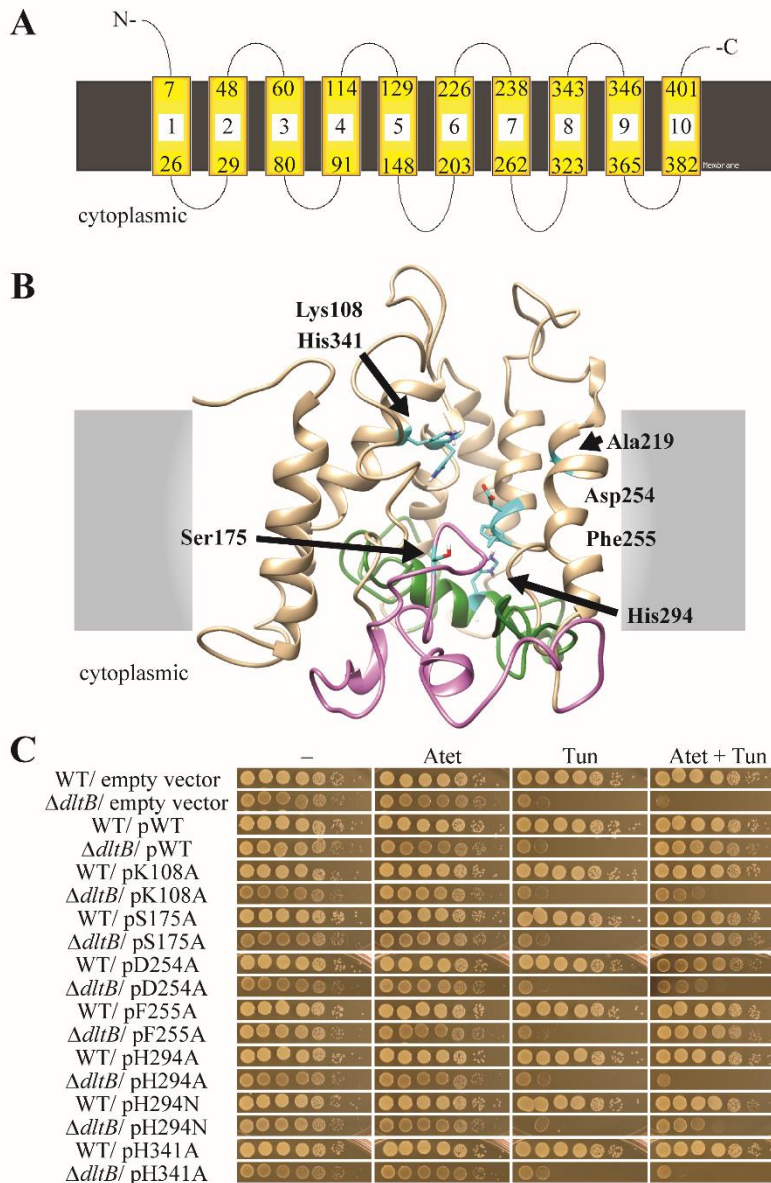

**Figure S13.** Tunicamycin-DLT synthetic lethality assay uncovers residues important to DltB function. As was performed for DltD, the topology of DltB was predicted with several programs. *Panel A* shows the result from MEMSAT3. In short, among the programs shown for DltD topology prediction, MEMSAT3 yielded the most consistent results among bacterial MBOAT family members in the conserved region from TM helices 4 – 9, and the prediction roughly agrees with a MUSCLE alignment to the well-studied MBOAT, GOAT. GOAT was found to have a reentrant loop that aligns with DltB’s 100–153 cytoplasmic loop. From structural prediction using covariance analysis, this region was found to lie partially in the membrane for DltB as well (purple ribbons in *Panel B*, <evfold.org/evfold-web/newprediction.do>). Covariance analysis measures evolutionary pressure on pairs of residues across a family of related proteins based on their propensity to co-occur in particular pairs (51). Covariance can result from evolutionarily conserved, physical interactions within a protein. Also shown in *Panel B* in dark green is a second apparent reentrant loop at the cytoplasmic face of the membrane from residues 214-273. This loop is densely populated with conserved residues in DltB orthologs including the His294 which is conserved as a His or Asn throughout the MBOAT family. These two loops appear to form interactions with

residues on transmembrane helices which may allow formation of a pocket for D-ala-DltC to bind. Besides the conserved MBOAT residues, His294 and His341, Panel B also shows the position of residues found mutated in Amsacrine resistant strains selected in the lab: Ser175, Ala219, and Phe255 (29). Site-directed mutagenesis of these residues as well as additional residues guided by the structural model was performed. In *Panel C*, WT and mutant *dltB* expressed off of an integrative vector as part of the *dltABCD* operon were tested for complementation of *dltB* null strain growth in the presence of 1  $\mu\text{g/mL}$  tunicamycin. Tunicamycin (Tun) was added for synthetic lethal DLT selection, and Anhydrotetracycline (Atet) was added to 0.4  $\mu\text{M}$  for induction off the integrative vector. H294A and H341A were completely inactive as found for other MBOAT family members. Most MBOAT proteins contain an asparagine at the His294 position, and the H294N mutation regained activity relative to the alanine mutant. The alanine-substitution at the amsacrine associated residues, Ser175 and Phe255, displayed WT activity. The nearby Asp254 showed reduced activity when mutated to alanine possibly suggesting the placement of Asp254 and Phe255 in the model near the center of the protein to be correct. Another residue predicted to be juxtaposed next to His341, Lys108, was found to also lower activity in DltB upon substitution to alanine.

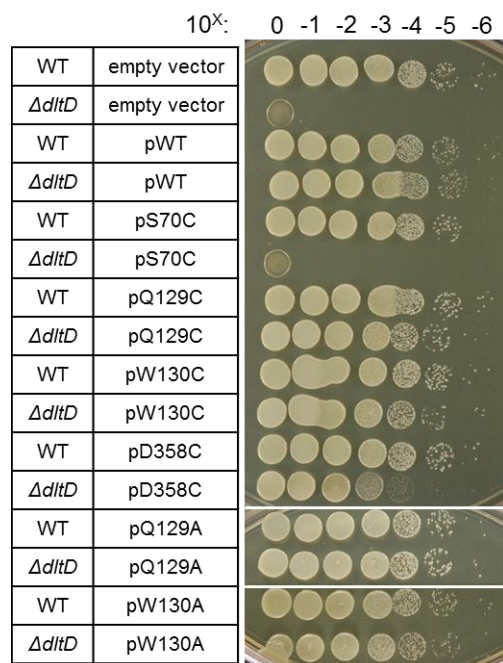

**Figure S14.** Cysteine substitution of residues Q129 and W130 were active by tunicamycin growth complementation. The cell-based assay for DLT activity by complementation of growth of *dlt* null mutants in the presence of tunicamycin (see Materials and Methods) was used to assess the activity in site-directed mutants of DltD in which Q129 and W130 were substituted to alanine or cysteine. None of the four mutants showed a loss of activity relative to wild-type. Additional cysteine mutants at the putative catalytic residues Ser70 and Asp358 showed a significant effect on growth, with a complete loss of activity seen for S70C.

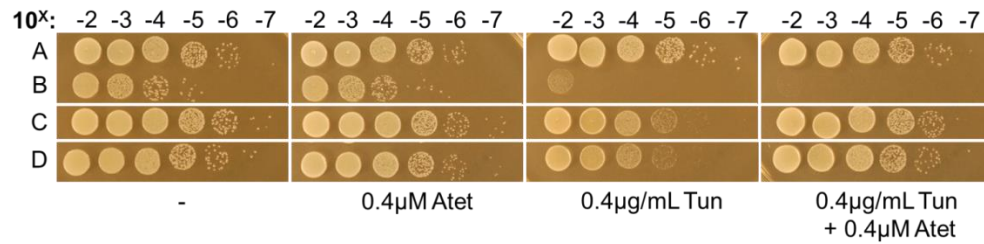

**Figure S15.** *DltD* activity is unaffected by an *N*-terminal myc-tag. *S. aureus* wild-type (A) and a *dltD* null mutant (B, C, and D) were transformed with either empty vector (A – B) or a plasmid containing the whole *dlt* operon with native *dltD* (C) or *dltD* fused with an *N*-terminal myc-tag (D). The native and myc-tagged constructs provide equal growth complementation in the presence of tunicamycin (Tun). Wall teichoic acid biosynthesis and the *dlt* operon are synthetically lethal, so treatment with the TarO inhibitor, tunicamycin, creates a *dlt*-selective condition. Anhydrotetracycline (Atet) induced the expression of the *dlt* operon from a plasmid, so comparison of Tun sensitivity with and without expression shows the specificity of the growth complementation to the *dlt* expression.

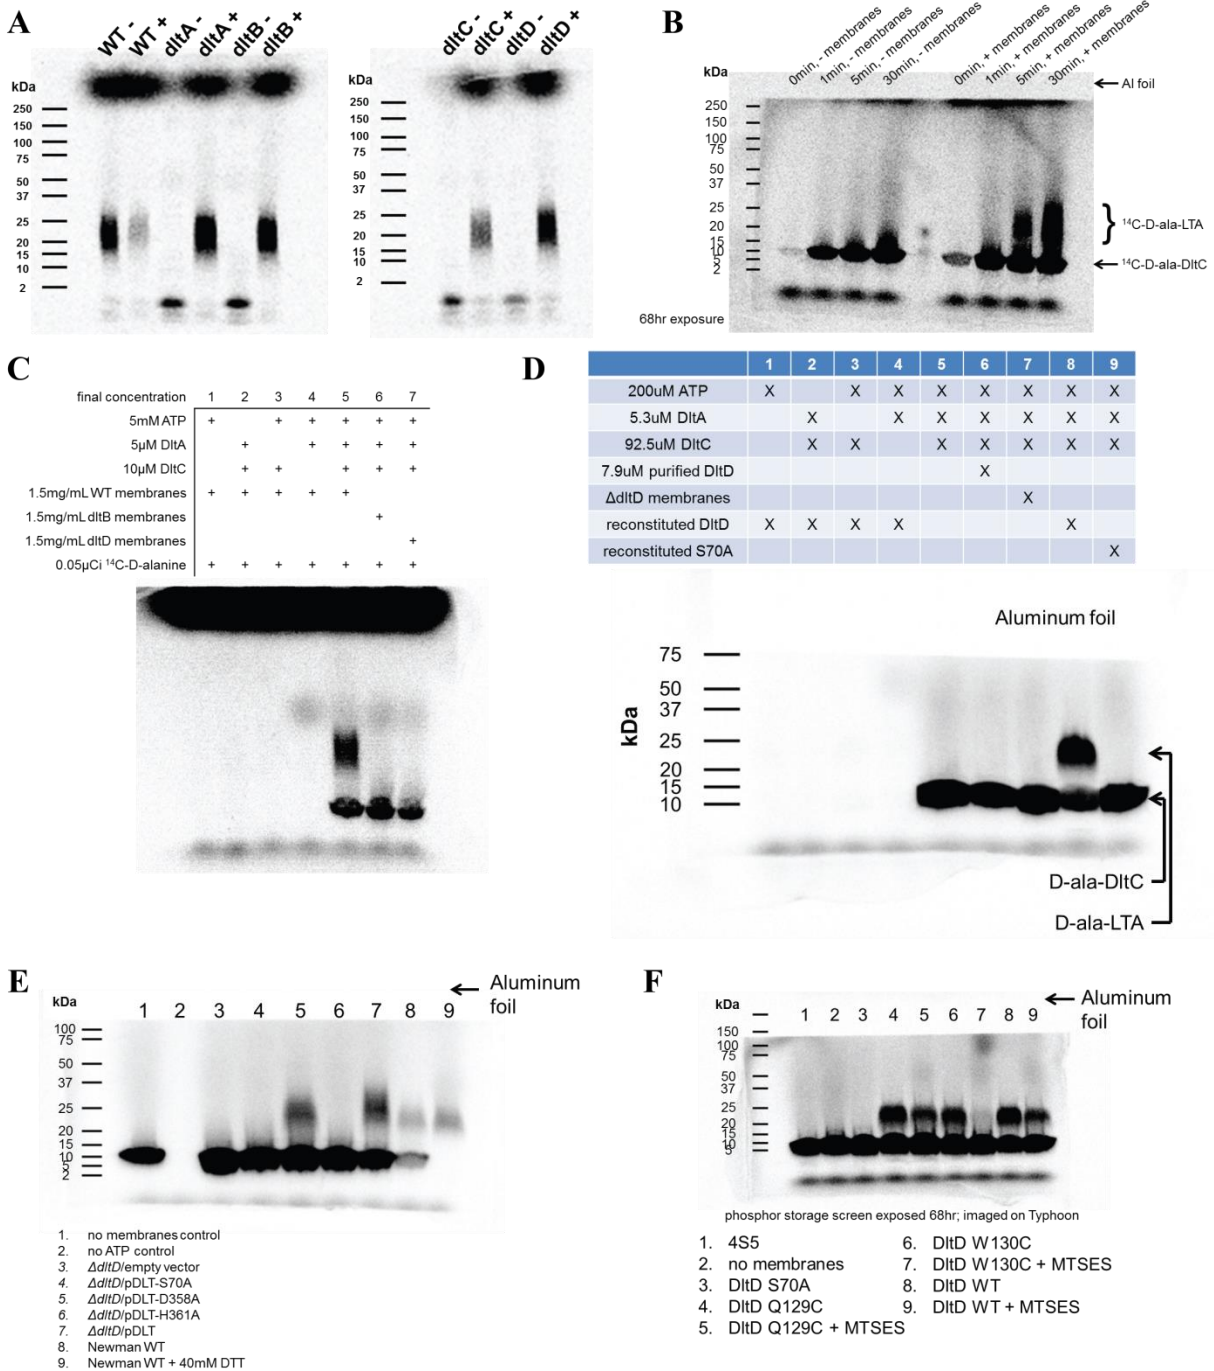

**Figure S16.** Full gels from main text figures. Figure 2 Panel C is shown in in Panel A. The inset of Figure 3 Panel A and Panels B and C are shown here in Panel B, C, and D, respectively. Lastly, Figure 5 Panels C and D are shown here in Panels E and F, respectively.

## References

1. Perego, M., Glaser, P., Minutello, A., Strauch, M. A., Leopold, K., and Fischer, W. (1995) Incorporation of D-Alanine into Lipoteichoic Acid and Wall Teichoic Acid in *Bacillus subtilis* IDENTIFICATION OF GENES AND REGULATION. *J. Biol. Chem.* **270**, 15598–15606
2. Peschel, A., Otto, M., Jack, R. W., Kalbacher, H., Jung, G., and Götz, F. (1999) Inactivation of the *dlt* Operon in *Staphylococcus aureus* Confers Sensitivity to Defensins, Protegrins, and Other Antimicrobial Peptides. *J. Biol. Chem.* **274**, 8405–8410
3. Clemans, D. L., Kolenbrander, P. E., Debabov, D. V., Zhang, Q., Lunsford, R. D., Sakone, H., Whittaker, C. J., Heaton, M. P., and Neuhaus, F. C. (1999) Insertional Inactivation of Genes Responsible for the d-Alanylation of Lipoteichoic Acid in *Streptococcus gordonii* DL1 (Challis) Affects Intrageneric Coaggregations. *Infect. Immun.* **67**, 2464–2474
4. Boyd, D. A., Cvitkovitch, D. G., Bleiweis, A. S., Kiriukhin, M. Y., Debabov, D. V., Neuhaus, F. C., and Hamilton, I. R. (2000) Defects in d-Alanyl-Lipoteichoic Acid Synthesis in *Streptococcus mutans* Results in Acid Sensitivity. *J. Bacteriol.* **182**, 6055–6065
5. Nilsson, M., Rybtke, M., Givskov, M., Høiby, N., Twetman, S., and Tolker-Nielsen, T. (2016) The *dlt* genes play a role in antimicrobial tolerance of *Streptococcus mutans* biofilms. *Int. J. Antimicrob. Agents.* **48**, 298–304
6. Kovács, M., Halfmann, A., Fedtke, I., Heintz, M., Peschel, A., Vollmer, W., Hakenbeck, R., and Brückner, R. (2006) A functional *dlt* operon, encoding proteins required for incorporation of d-alanine in teichoic acids in gram-positive bacteria, confers resistance to cationic antimicrobial peptides in *Streptococcus pneumoniae*. *J. Bacteriol.* **188**, 5797–5805
7. Kristian, S. A., Datta, V., Weidenmaier, C., Kansal, R., Fedtke, I., Peschel, A., Gallo, R. L., and Nizet, V. (2005) d-Alanylation of Teichoic Acids Promotes Group A *Streptococcus* Antimicrobial Peptide Resistance, Neutrophil Survival, and Epithelial Cell Invasion. *J. Bacteriol.* **187**, 6719–6725
8. Debabov, D. V., Kiriukhin, M. Y., and Neuhaus, F. C. (2000) Biosynthesis of Lipoteichoic Acid in *Lactobacillus rhamnosus*: Role of DltD in d-Alanylation. *J. Bacteriol.* **182**, 2855–2864
9. McBride, S. M., and Sonenshein, A. L. (2011) The *dlt* operon confers resistance to cationic antimicrobial peptides in *Clostridium difficile*. *Microbiology.* **157**, 1457–1465
10. Fabretti, F., Theilacker, C., Baldassarri, L., Kaczynski, Z., Kropec, A., Holst, O., and Huebner, J. (2006) Alanine Esters of Enterococcal Lipoteichoic Acid Play a Role in Biofilm Formation and Resistance to Antimicrobial Peptides. *Infect. Immun.* **74**, 4164–4171
11. Peschel, A., Vuong, C., Otto, M., and Götz, F. (2000) The D-alanine residues of *Staphylococcus aureus* teichoic acids alter the susceptibility to vancomycin and the activity of autolytic enzymes. *Antimicrob. Agents Chemother.* **44**, 2845–2847
12. Matsuo, M., Oogai, Y., Kato, F., Sugai, M., and Komatsuzawa, H. (2011) Growth-phase dependence of susceptibility to antimicrobial peptides in *Staphylococcus aureus*. *Microbiology.* **157**, 1786–1797
13. Simanski, M., Gläser, R., Köten, B., Meyer-Hoffert, U., Wanner, S., Weidenmaier, C., Peschel, A., and Harder, J. (2013) *Staphylococcus aureus* subverts cutaneous defense by D-alanylation of teichoic acids. *Exp. Dermatol.* **22**, 294–296
14. Blake, K. L., and O'Neill, A. J. (2013) Transposon library screening for identification of genetic loci participating in intrinsic susceptibility and acquired resistance to antistaphylococcal agents. *J. Antimicrob. Chemother.* **68**, 12–16
15. Mazda, Y., Kawada-Matsuo, M., Kanbara, K., Oogai, Y., Shibata, Y., Yamashita, Y., Miyawaki, S., and Komatsuzawa, H. (2012) Association of CiaRH with resistance of *Streptococcus mutans* to antimicrobial peptides in biofilms. *Mol. Oral Microbiol.* **27**, 124–135
16. Poyart, C., Pellegrini, E., Marceau, M., Baptista, M., Jaubert, F., Lamy, M.-C., and Trieu-Cuot, P. (2003) Attenuated virulence of *Streptococcus agalactiae* deficient in D-alanyl-lipoteichoic acid is due to an increased susceptibility to defensins and phagocytic cells. *Mol. Microbiol.* **49**, 1615–1625



17. Saar-Dover, R., Bitler, A., Nezer, R., Shmuel-Galia, L., Firon, A., Shimoni, E., Trieu-Cuot, P., and Shai, Y. (2012) D-Alanylation of Lipoteichoic Acids Confers Resistance to Cationic Peptides in Group B Streptococcus by Increasing the Cell Wall Density. *PLOS Pathog.* **8**, e1002891
18. Perea Vélez, M., Verhoeven, T. L. A., Draing, C., Von Aulock, S., Pfitzenmaier, M., Geyer, A., Lambrichts, I., Grangette, C., Pot, B., Vanderleyden, J., and De Keersmaecker, S. C. J. (2007) Functional analysis of D-alanylation of lipoteichoic acid in the probiotic strain *Lactobacillus rhamnosus* GG. *Appl. Environ. Microbiol.* **73**, 3595–3604
19. Walter, J., Loach, D. M., Alqumber, M., Rockel, C., Hermann, C., Pfitzenmaier, M., and Tannock, G. W. (2007) D-alanyl ester depletion of teichoic acids in *Lactobacillus reuteri* 100-23 results in impaired colonization of the mouse gastrointestinal tract. *Environ. Microbiol.* **9**, 1750–1760
20. Revilla-Guarinos, A., Gebhard, S., Alcántara, C., Staron, A., Mascher, T., and Zúñiga, M. (2013) Characterization of a regulatory network of peptide antibiotic detoxification modules in *Lactobacillus casei* BL23. *Appl. Environ. Microbiol.* **79**, 3160–3170
21. Abachin, E., Poyart, C., Pellegrini, E., Milohanic, E., Fiedler, F., Berche, P., and Trieu-Cuot, P. (2002) Formation of D-alanyl-lipoteichoic acid is required for adhesion and virulence of *Listeria monocytogenes*. *Mol. Microbiol.* **43**, 1–14
22. Cafiso, V., Bertuccio, T., Purrello, S., Campanile, F., Mammina, C., Sartor, A., Raglio, A., and Stefani, S. (2014) *dltA* overexpression: A strain-independent keystone of daptomycin resistance in methicillin-resistant *Staphylococcus aureus*. *Int. J. Antimicrob. Agents.* **43**, 26–31
23. Mishra, N. N., Bayer, A. S., Weidenmaier, C., Grau, T., Wanner, S., Stefani, S., Cafiso, V., Bertuccio, T., Yeaman, M. R., Nast, C. C., and Yang, S.-J. (2014) Phenotypic and Genotypic Characterization of Daptomycin-Resistant Methicillin-Resistant *Staphylococcus aureus* Strains: Relative Roles of *mprF* and *dlt* Operons. *PLOS ONE.* **9**, e107426
24. Mechler, L., Bonetti, E.-J., Reichert, S., Flötenmeyer, M., Schrenzel, J., Bertram, R., François, P., and Götz, F. (2016) Daptomycin Tolerance in the *Staphylococcus aureus* pitA6 Mutant Is Due to Upregulation of the *dlt* Operon. *Antimicrob. Agents Chemother.* **60**, 2684–2691
25. Kang, K.-M., Mishra, N. N., Park, K. T., Lee, G.-Y., Park, Y. H., Bayer, A. S., and Yang, S.-J. (2017) Phenotypic and genotypic correlates of daptomycin-resistant methicillin-susceptible *Staphylococcus aureus* clinical isolates. *J. Microbiol. Seoul Korea.* **55**, 153–159
26. Wecke, J., Madela, K., and Fischer, W. (1997) The absence of D-alanine from lipoteichoic acid and wall teichoic acid alters surface charge, enhances autolysis and increases susceptibility to methicillin in *Bacillus subtilis*. *Microbiology.* **143**, 2953–2960
27. Nakao, A., Imai, S., and Takano, T. (2000) Transposon-mediated insertional mutagenesis of the D-alanyl-lipoteichoic acid (*dlt*) operon raises methicillin resistance in *Staphylococcus aureus*. *Res. Microbiol.* **151**, 823–829
28. Maria, J. P. S., Sadaka, A., Moussa, S. H., Brown, S., Zhang, Y. J., Rubin, E. J., Gilmore, M. S., and Walker, S. (2014) Compound-gene interaction mapping reveals distinct roles for *Staphylococcus aureus* teichoic acids. *Proc. Natl. Acad. Sci.* **111**, 12510–12515
29. Pasquina, L., Santa Maria Jr, J. P., McKay Wood, B., Moussa, S. H., Matano, L. M., Santiago, M., Martin, S. E. S., Lee, W., Meredith, T. C., and Walker, S. (2016) A synthetic lethal approach for compound and target identification in *Staphylococcus aureus*. *Nat. Chem. Biol.* **12**, 40–45
30. Bensaci, M. F., and Takemoto, J. Y. (2007) Syringopeptin SP25A-mediated killing of gram-positive bacteria and the role of teichoic acid d-alanylation. *FEMS Microbiol. Lett.* **268**, 106–111
31. Koprivnjak, T., Peschel, A., Gelb, M. H., Liang, N. S., and Weiss, J. P. (2002) Role of Charge Properties of Bacterial Envelope in Bactericidal Action of Human Group IIA Phospholipase A2 against *Staphylococcus aureus*. *J. Biol. Chem.* **277**, 47636–47644



32. Guariglia-Oropeza, V., and Helmann, J. D. (2011) Bacillus subtilis  $\sigma^V$  Confers Lysozyme Resistance by Activation of Two Cell Wall Modification Pathways, Peptidoglycan O-Acetylation and d-Alanylation of Teichoic Acids  $\nabla$ . *J. Bacteriol.* **193**, 6223–6232
33. Herbert, S., Bera, A., Nerz, C., Kraus, D., Peschel, A., Goerke, C., Meehl, M., Cheung, A., and Götz, F. (2007) Molecular Basis of Resistance to Muramidase and Cationic Antimicrobial Peptide Activity of Lysozyme in Staphylococci. *PLOS Pathog.* **3**, e102
34. Wecke, J., Perego, M., and Fischer, W. (1996) D-alanine deprivation of Bacillus subtilis teichoic acids is without effect on cell growth and morphology but affects the autolytic activity. *Microb. Drug Resist. Larchmt. N.* **2**, 123–129
35. Steen, A., Palumbo, E., Deghorain, M., Cocconcelli, P. S., Delcour, J., Kuipers, O. P., Kok, J., Buist, G., and Hols, P. (2005) Autolysis of Lactococcus lactis Is Increased upon d-Alanine Depletion of Peptidoglycan and Lipoteichoic Acids. *J. Bacteriol.* **187**, 114–124
36. Archibald, A. R., Baddiley, J., and Heptinstall, S. (1973) The alanine ester content and magnesium binding capacity of walls of Staphylococcus aureus H grown at different pH values. *Biochim. Biophys. Acta.* **291**, 629–634
37. MacArthur, A. E., and Archibald, A. R. (1984) Effect of culture pH on the D-alanine ester content of lipoteichoic acid in Staphylococcus aureus. *J. Bacteriol.* **160**, 792–793
38. Revilla-Guarinos, A., Alcántara, C., Rozès, N., Voigt, B., and Zúñiga, M. (2014) Characterization of the response to low pH of Lactobacillus casei  $\Delta$ RR12, a mutant strain with low D-alanylation activity and sensitivity to low pH. *J. Appl. Microbiol.* **116**, 1250–1261
39. Gross, M., Cramton, S. E., Götz, F., and Peschel, A. (2001) Key Role of Teichoic Acid Net Charge in Staphylococcus aureus Colonization of Artificial Surfaces. *Infect. Immun.* **69**, 3423–3426
40. Hyyryläinen, H.-L., Vitikainen, M., Thwaite, J., Wu, H., Sarvas, M., Harwood, C. R., Kontinen, V. P., and Stephenson, K. (2000) d-Alanine Substitution of Teichoic Acids as a Modulator of Protein Folding and Stability at the Cytoplasmic Membrane/Cell Wall Interface of Bacillus subtilis. *J. Biol. Chem.* **275**, 26696–26703
41. Koprivnjak, T., Mlakar, V., Swanson, L., Fournier, B., Peschel, A., and Weiss, J. P. (2006) Cation-Induced Transcriptional Regulation of the dlt Operon of Staphylococcus aureus. *J. Bacteriol.* **188**, 3622–3630
42. Kaito, C., and Sekimizu, K. (2007) Colony Spreading in Staphylococcus aureus. *J. Bacteriol.* **189**, 2553–2557
43. Fischer, W., and Rösel, P. (1980) The alanine ester substitution of lipoteichoic acid (LTA) in Staphylococcus aureus. *FEBS Lett.* **119**, 224–226
44. Collins, L. V., Kristian, S. A., Weidenmaier, C., Faigle, M., Kessel, V., M, K. P., Strijp, V., G, J. A., Götz, F., Neumeister, B., and Peschel, A. (2002) Staphylococcus aureus Strains Lacking d-Alanine Modifications of Teichoic Acids Are Highly Susceptible to Human Neutrophil Killing and Are Virulence Attenuated in Mice. *J. Infect. Dis.* **186**, 214–219
45. Wobser, D., Ali, L., Grohmann, E., Huebner, J., and Sakinc, T. (2014) A Novel Role for D-Alanylation of Lipoteichoic Acid of Enterococcus faecalis in Urinary Tract Infection. *PLOS ONE.* **9**, e107827
46. Weidenmaier, C., McLoughlin, R. M., and Lee, J. C. (2010) The Zwitterionic Cell Wall Teichoic Acid of Staphylococcus aureus Provokes Skin Abscesses in Mice by a Novel CD4+ T-Cell-Dependent Mechanism. *PLoS ONE.* 10.1371/journal.pone.0013227
47. Neuhaus, F. C., and Baddiley, J. (2003) A Continuum of Anionic Charge: Structures and Functions of d-Alanyl-Teichoic Acids in Gram-Positive Bacteria. *Microbiol. Mol. Biol. Rev.* **67**, 686–723
48. Gründling, A., and Schneewind, O. (2007) Synthesis of glycerol phosphate lipoteichoic acid in Staphylococcus aureus. *Proc. Natl. Acad. Sci. U. S. A.* **104**, 8478–8483
49. Corrigan, R. M., Abbott, J. C., Burhenne, H., Kaefer, V., and Gründling, A. (2011) c-di-AMP Is a New Second Messenger in Staphylococcus aureus with a Role in Controlling Cell Size and Envelope Stress. *PLOS Pathog.* **7**, e1002217
50. Upton, C., and Buckley, J. T. (1995) A new family of lipolytic enzymes? *Trends Biochem. Sci.* **20**, 178–179

51. Hopf, T. A., Colwell, L. J., Sheridan, R., Rost, B., Sander, C., and Marks, D. S. (2012) Three-Dimensional Structures of Membrane Proteins from Genomic Sequencing. *Cell*. **149**, 1607–1621
